# Supplementary material for: Foxp2 Regulates Gene Networks Implicated in Neurite Outgrowth in the Developing Brain
Source: PLoS Genet. 2011 Jul 7;7(7):e1002145. doi: 10.1371/journal.pgen.1002145 (PMC3131290; doi:10.1371/journal.pgen.1002145)
Supplement: Table S4 — Foxp2-dependent gene expression changes in the E16 mouse brain (p<0.01). (XLS) [file pgen.1002145.s012.xls]

## Sheet: Sheet1
Table S4. Foxp2-dependent gene expression changes in the E16 mouse brain (p<0.01)
ID	logFC	t	P.Value	adj.P.Val	B	Entrez_Gene_ID	Symbol	Chromosome	Cytoband	Definition	Ontology_Component	Ontology_Process	Ontology_Function
5720370	-2.47893	-21.5294	2.41816170479912e-14	5.91941803717776e-10	10.9769	NA	2310036D22Rik
20619	2.49821	20.0782	8.14253280356208e-14	9.9660530249198e-10	10.7314	NA	Shhrs
2940070	-1.28272	-18.4034	3.67008072990300e-13	2.99466353957652e-09	10.3885	114142	Foxp2	6	6qA1	Mus musculus forkhead box P2 (Foxp2), transcript variant 2, mRNA.	nucleus [goid 5634] [evidence IEA]; intracellular [goid 5622] [evidence IEA]; nucleus [goid 5634] [evidence IEA]; intracellular [goid 5622] [evidence IEA]; nucleus [goid 5634] [evidence IEA]; intracellular [goid 5622] [evidence IEA]	regulation of transcription, DNA-dependent [goid 6355] [evidence IEA]; negative regulation of transcription [goid 16481] [evidence IDA]; transcription [goid 6350] [evidence IEA]; negative regulation of transcription from RNA polymerase II promoter [goid 122] [evidence IDA]; regulation of transcription, DNA-dependent [goid 6355] [evidence IEA]; negative regulation of transcription [goid 16481] [ev…	protein homodimerization activity [goid 42803] [evidence IPI]; transcription factor activity [goid 3700] [evidence IEA]; protein heterodimerization activity [goid 46982] [evidence IPI]; DNA binding [goid 3677] [evidence IDA]; protein binding [goid 5515] [evidence IPI]; sequence-specific DNA binding [goid 43565] [evidence IEA]; transcriptional repressor activity [goid 16564] [evidence IDA]; zinc i…
7560048	-1.52109	-17.9015	5.90371487021658e-13	3.61292590770079e-09	10.2708	114142	Foxp2	6	6qA1	Mus musculus forkhead box P2 (Foxp2), transcript variant 1, mRNA.	nucleus [goid 5634] [evidence IEA]; intracellular [goid 5622] [evidence IEA]	regulation of transcription, DNA-dependent [goid 6355] [evidence IEA]; negative regulation of transcription [goid 16481] [evidence IDA]; transcription [goid 6350] [evidence IEA]; negative regulation of transcription from RNA polymerase II promoter [goid 122] [evidence IDA]	protein homodimerization activity [goid 42803] [evidence IPI]; transcription factor activity [goid 3700] [evidence IEA]; protein heterodimerization activity [goid 46982] [evidence IPI]; DNA binding [goid 3677] [evidence IDA]; protein binding [goid 5515] [evidence IPI]; sequence-specific DNA binding [goid 43565] [evidence IEA]; transcriptional repressor activity [goid 16564] [evidence IDA]; zinc i…
4260026	-1.29619	-14.2615	2.77928884084999e-11	1.36068423070334e-07	9.13048	114142	Foxp2	6	6qA1	Mus musculus forkhead box P2 (Foxp2), transcript variant 2, mRNA.	nucleus [goid 5634] [evidence IEA]; intracellular [goid 5622] [evidence IEA]; nucleus [goid 5634] [evidence IEA]; intracellular [goid 5622] [evidence IEA]; nucleus [goid 5634] [evidence IEA]; intracellular [goid 5622] [evidence IEA]	regulation of transcription, DNA-dependent [goid 6355] [evidence IEA]; negative regulation of transcription [goid 16481] [evidence IDA]; transcription [goid 6350] [evidence IEA]; negative regulation of transcription from RNA polymerase II promoter [goid 122] [evidence IDA]; regulation of transcription, DNA-dependent [goid 6355] [evidence IEA]; negative regulation of transcription [goid 16481] [ev…	protein homodimerization activity [goid 42803] [evidence IPI]; transcription factor activity [goid 3700] [evidence IEA]; protein heterodimerization activity [goid 46982] [evidence IPI]; DNA binding [goid 3677] [evidence IDA]; protein binding [goid 5515] [evidence IPI]; sequence-specific DNA binding [goid 43565] [evidence IEA]; transcriptional repressor activity [goid 16564] [evidence IDA]; zinc i…
6110138	-0.964184	-9.73983	1.27701183552793e-08	5.20999545364805e-05	6.53223	NA	2210410E06Rik
50100	-0.916247	-8.47413	1.02922823269494e-07	0.000359921	5.41044	NA	9330117B14
3390228	-0.638798	-7.08009	1.29599818872852e-06	0.00396559	3.88994	68272	Rbm28	6	6qA3.3	Mus musculus RNA binding motif protein 28 (Rbm28), transcript variant 2, mRNA.	nucleus [goid 5634] [evidence IEA]; nucleus [goid 5634] [evidence IEA]		RNA binding [goid 3723] [evidence IEA]; nucleic acid binding [goid 3676] [evidence IEA]; nucleotide binding [goid 166] [evidence IEA]; RNA binding [goid 3723] [evidence IEA]; nucleic acid binding [goid 3676] [evidence IEA]; nucleotide binding [goid 166] [evidence IEA]
5810048	-0.49987	-6.76878	2.36443358434119e-06	0.006431	3.50467	NA	Zfpn1a1
4590592	-2.75813	-6.36696	5.23827130288319e-06	0.0128228	2.98138	NA	D330027H18Rik
4570189	0.519896	6.08238	9.322170428167e-06	0.0207452	2.59289	64011	Nrgn	9	9qA4	Mus musculus neurogranin (Nrgn), mRNA.		protein kinase cascade [goid 7243] [evidence TAS]	calmodulin binding [goid 5516] [evidence TAS]
2070070	-0.435866	-5.86474	1.45901257113407e-05	0.0297626	2.28577	22778	Ikzf1	11	11qA1	Mus musculus IKAROS family zinc finger 1 (Ikzf1), transcript variant 1, mRNA.	transcription factor complex [goid 5667] [evidence TAS]; nucleus [goid 5634] [evidence IDA]; centric heterochromatin [goid 5721] [evidence IDA]; intracellular [goid 5622] [evidence IEA]; transcription factor complex [goid 5667] [evidence TAS]; nucleus [goid 5634] [evidence IDA]; centric heterochromatin [goid 5721] [evidence IDA]; intracellular [goid 5622] [evidence IEA]	regulation of transcription, DNA-dependent [goid 6355] [evidence IMP]; hemopoiesis [goid 30097] [evidence IMP]; negative regulation of transcription [goid 16481] [evidence IDA]; positive regulation of transcription from RNA polymerase II promoter [goid 45944] [evidence IDA]; positive regulation of body size [goid 40018] [evidence IMP]; transcription [goid 6350] [evidence IEA]; forebrain developme…	transcription factor activity [goid 3700] [evidence IDA]; DNA binding [goid 3677] [evidence IDA]; protein binding [goid 5515] [evidence IPI]; transcriptional repressor activity [goid 16564] [evidence IDA]; zinc ion binding [goid 8270] [evidence IEA]; metal ion binding [goid 46872] [evidence IEA]; nucleic acid binding [goid 3676] [evidence IEA]; transcription factor activity [goid 3700] [evidence …
4900386	0.42606	5.80769	1.64241869099206e-05	0.0309267	2.20385	244723	Olfm2	9	9qA3	Mus musculus olfactomedin 2 (Olfm2), mRNA.	membrane [goid 16020] [evidence IEA]; membrane [goid 16020] [evidence IEA]		latrotoxin receptor activity [goid 16524] [evidence IEA]; latrotoxin receptor activity [goid 16524] [evidence IEA]
5560692	-0.815509	-5.56383	2.73709252292283e-05	0.0478581	1.84707	NA	Paip1	13	13qD2.3			regulation of translation [goid 6445] [evidence IEA]; regulation of protein biosynthesis [goid 6417] [evidence IEA]	molecular_function [goid 3674] [evidence ND ]; RNA binding [goid 3723] [evidence IEA]
630072	0.502443	5.10986	7.21468256568477e-05	0.111392	1.15537	NA	Ddn
7610142	0.384987	5.10564	7.28080859133486e-05	0.111392	1.14878	16512	Kcnh3	15	15qF1	Mus musculus potassium voltage-gated channel, subfamily H (eag-related), member 3 (Kcnh3), mRNA.	integral to plasma membrane [goid 5887] [evidence IEA]; membrane [goid 16020] [evidence IEA]; integral to membrane [goid 16021] [evidence IEA]	ion transport [goid 6811] [evidence IEA]; two-component signal transduction system (phosphorelay) [goid 160] [evidence IEA]; regulation of transcription, DNA-dependent [goid 6355] [evidence IEA]; signal transduction [goid 7165] [evidence IEA]; transport [goid 6810] [evidence IEA]; potassium ion transport [goid 6813] [evidence IEA]	potassium channel activity [goid 5267] [evidence IEA]; potassium ion binding [goid 30955] [evidence IEA]; ion channel activity [goid 5216] [evidence IEA]; signal transducer activity [goid 4871] [evidence IEA]; voltage-gated potassium channel activity [goid 5249] [evidence IEA]; voltage-gated ion channel activity [goid 5244] [evidence IEA]
4070358	0.459358	5.05309	8.15707685083831e-05	0.117457	1.06646	76500	Ihpk2	9	9qF2	Mus musculus inositol hexaphosphate kinase 2 (Ihpk2), mRNA.	nucleus [goid 5634] [evidence IEA]; nucleus [goid 5634] [evidence IEA]		kinase activity [goid 16301] [evidence IEA]; transferase activity [goid 16740] [evidence IEA]; inositol hexakisphosphate kinase activity [goid 50517] [evidence IEA]; kinase activity [goid 16301] [evidence IEA]; transferase activity [goid 16740] [evidence IEA]; inositol hexakisphosphate kinase activity [goid 50517] [evidence IEA]
7550441	0.493993	4.97408	9.6821072279923e-05	0.131671	0.941877	76500	Ihpk2	9	9qF2	Mus musculus inositol hexaphosphate kinase 2 (Ihpk2), mRNA.	nucleus [goid 5634] [evidence IEA]; nucleus [goid 5634] [evidence IEA]		kinase activity [goid 16301] [evidence IEA]; transferase activity [goid 16740] [evidence IEA]; inositol hexakisphosphate kinase activity [goid 50517] [evidence IEA]; kinase activity [goid 16301] [evidence IEA]; transferase activity [goid 16740] [evidence IEA]; inositol hexakisphosphate kinase activity [goid 50517] [evidence IEA]
3990202	0.402508	4.87682	0.00011966	0.146458	0.787195	NA	Syn1
430025	0.348116	4.87948	0.000118967	0.146458	0.791447	NA	Cck
7200524	-0.382322	-4.654	0.000194995	0.2273	0.427597	19049	Ppp1r1b	11	11qD	Mus musculus protein phosphatase 1, regulatory (inhibitor) subunit 1B (Ppp1r1b), mRNA.	cytoplasm [goid 5737] [evidence TAS]; cytoplasm [goid 5737] [evidence TAS]; cytoplasm [goid 5737] [evidence TAS]	transcription [goid 6350] [evidence IMP]; signal transduction [goid 7165] [evidence IEA]; transcription [goid 6350] [evidence IMP]; signal transduction [goid 7165] [evidence IEA]; transcription [goid 6350] [evidence IMP]; signal transduction [goid 7165] [evidence IEA]	type 1 serine/threonine specific protein phosphatase inhibitor activity [goid 4865] [evidence TAS]; protein phosphatase inhibitor activity [goid 4864] [evidence TAS]; protein phosphatase type 1 regulator activity [goid 8599] [evidence IEA]; type 1 serine/threonine specific protein phosphatase inhibitor activity [goid 4865] [evidence TAS]; protein phosphatase inhibitor activity [goid 4864] [eviden…
4120019	0.437956	4.62228	0.0002091	0.229519	0.375844	54003	Nell2	15	15qE3-qF1	Mus musculus NEL-like 2 (chicken) (Nell2), mRNA.		cell adhesion [goid 7155] [evidence IEA]; cell adhesion [goid 7155] [evidence IEA]; cell adhesion [goid 7155] [evidence IEA]; cell adhesion [goid 7155] [evidence IEA]	calcium ion binding [goid 5509] [evidence IEA]; structural molecule activity [goid 5198] [evidence IEA]; calcium ion binding [goid 5509] [evidence IEA]; structural molecule activity [goid 5198] [evidence IEA]; calcium ion binding [goid 5509] [evidence IEA]; structural molecule activity [goid 5198] [evidence IEA]; calcium ion binding [goid 5509] [evidence IEA]; structural molecule activity [goid 5…
5910022	-0.364841	-4.60828	0.000215652	0.229519	0.352959	65970	D15Ertd366e	15	15qF1	Mus musculus LIM domain and actin binding 1 (Lima1), mRNA.	cytoskeleton [goid 5856] [evidence IEA]; stress fiber [goid 1725] [evidence ISS]; actin cytoskeleton [goid 15629] [evidence IDA]; focal adhesion [goid 5925] [evidence ISS]; cytoskeleton [goid 5856] [evidence IEA]; stress fiber [goid 1725] [evidence ISS]; actin cytoskeleton [goid 15629] [evidence IDA]; focal adhesion [goid 5925] [evidence ISS]	ruffle organization and biogenesis [goid 31529] [evidence ISS]; actin filament bundle formation [goid 51017] [evidence ISS]; ruffle organization and biogenesis [goid 31529] [evidence ISS]; actin filament bundle formation [goid 51017] [evidence ISS]	molecular_function [goid 3674] [evidence ND ]; actin filament binding [goid 51015] [evidence ISS]; zinc ion binding [goid 8270] [evidence IEA]; metal ion binding [goid 46872] [evidence IEA]; actin binding [goid 3779] [evidence IEA]; actin monomer binding [goid 3785] [evidence ISS]; molecular_function [goid 3674] [evidence ND ]; actin filament binding [goid 51015] [evidence ISS]; zinc ion binding …
5270475	0.309519	4.55225	0.000244025	0.248895	0.261111	NA	Trex1	9	9qF2		nucleus [goid 5634] [evidence IEA]; intracellular [goid 5622] [evidence IEA]	DNA repair [goid 6281] [evidence IEA]; DNA replication [goid 6260] [evidence ISS]; DNA recombination [goid 6310] [evidence ISS]; mismatch repair [goid 6298] [evidence ISS]; response to DNA damage stimulus [goid 6974] [evidence IEA]	nuclease activity [goid 4518] [evidence IEA]; exonuclease activity [goid 4527] [evidence IEA]; hydrolase activity [goid 16787] [evidence IEA]; protein homodimerization activity [goid 42803] [evidence ISS]; exodeoxyribonuclease III activity [goid 8853] [evidence IEA]; single-stranded DNA binding [goid 3697] [evidence ISS]; 3'-5' exonuclease activity [goid 8408] [evidence ISS]; magnesium ion bindin…
4070632	-0.366962	-4.43202	0.000318367	0.311732	0.0627017	NA	D230034L24Rik
5090047	-0.305587	-4.31729	0.000410662	0.386638	-0.128207	NA	scl000090.1_16_REVCOMP
2680523	0.398383	4.25598	0.000470638	0.426695	-0.230816	104582	Rprml	11	11qE1	Mus musculus reprimo-like (Rprml), mRNA.
5560497	-0.337909	-4.23697	0.000490963	0.429224	-0.262692	NA	Vil2
1030717	0.340711	4.20991	0.000521447	0.431137	-0.308149	380993	Zfat1	15	15qD2	Mus musculus ZFAT zinc finger 1 (Zfat1), mRNA.	nucleus [goid 5634] [evidence IEA]; intracellular [goid 5622] [evidence IEA]; nucleus [goid 5634] [evidence IEA]; intracellular [goid 5622] [evidence IEA]	transcription [goid 6350] [evidence IEA]; regulation of transcription, DNA-dependent [goid 6355] [evidence IEA]; transcription [goid 6350] [evidence IEA]; regulation of transcription, DNA-dependent [goid 6355] [evidence IEA]	DNA binding [goid 3677] [evidence IEA]; zinc ion binding [goid 8270] [evidence IEA]; metal ion binding [goid 46872] [evidence IEA]; nucleic acid binding [goid 3676] [evidence IEA]; DNA binding [goid 3677] [evidence IEA]; zinc ion binding [goid 8270] [evidence IEA]; metal ion binding [goid 46872] [evidence IEA]; nucleic acid binding [goid 3676] [evidence IEA]
7040201	0.381617	4.20398	0.000528376	0.431137	-0.318117	21838	Thy1	9	9qA5.1	Mus musculus thymus cell antigen 1, theta (Thy1), mRNA.	cytosol [goid 5829] [evidence ISS]; growth cone [goid 30426] [evidence ISS]; plasma membrane [goid 5886] [evidence ISS]; membrane [goid 16020] [evidence IEA]; external side of plasma membrane [goid 9897] [evidence IDA]; lipid raft [goid 45121] [evidence ISS]	cytoskeleton organization and biogenesis [goid 7010] [evidence ISS]; negative regulation of cell migration [goid 30336] [evidence ISS]; mast cell activation [goid 45576] [evidence ISS]; negative regulation of fibroblast proliferation [goid 48147] [evidence ISS]; negative regulation of apoptosis [goid 43066] [evidence ISS]; retinal cone cell development [goid 46549] [evidence IMP]; negative regula…	GPI anchor binding [goid 48503] [evidence ISS]; Rho GTPase activator activity [goid 5100] [evidence ISS]
10092	-0.343383	-4.0153	0.000804763	0.516033	-0.636983	NA	Stau2
1690450	-0.376946	-3.97253	0.000885386	0.516033	-0.709639	NA	Cxxc6
2260291	0.315913	3.9978	0.000836809	0.516033	-0.666685	241296	Lrrc8a	2	2qB	Mus musculus leucine rich repeat containing 8A (Lrrc8a), mRNA.
2320300	0.349337	4.04397	0.000754879	0.516033	-0.588346	NA	LOC279653
2510468	-0.379994	-4.04337	0.000755879	0.516033	-0.589352	98970	Fibcd1	2	2qB	Mus musculus fibrinogen C domain containing 1 (Fibcd1), mRNA.
3360554	0.409565	3.97568	0.000879171	0.516033	-0.704275	54003	Nell2	15	15qE3-qF1	Mus musculus NEL-like 2 (chicken) (Nell2), mRNA.		cell adhesion [goid 7155] [evidence IEA]; cell adhesion [goid 7155] [evidence IEA]; cell adhesion [goid 7155] [evidence IEA]; cell adhesion [goid 7155] [evidence IEA]	calcium ion binding [goid 5509] [evidence IEA]; structural molecule activity [goid 5198] [evidence IEA]; calcium ion binding [goid 5509] [evidence IEA]; structural molecule activity [goid 5198] [evidence IEA]; calcium ion binding [goid 5509] [evidence IEA]; structural molecule activity [goid 5198] [evidence IEA]; calcium ion binding [goid 5509] [evidence IEA]; structural molecule activity [goid 5…
380242	0.358902	4.05367	0.0007387	0.516033	-0.57189	18483	Palm	10	10qC1	Mus musculus paralemmin (Palm), mRNA.	cytoplasm [goid 5737] [evidence IDA]; membrane [goid 16020] [evidence IEA]; plasma membrane [goid 5886] [evidence IDA]; cytoplasm [goid 5737] [evidence IDA]; membrane [goid 16020] [evidence IEA]; plasma membrane [goid 5886] [evidence IDA]; cytoplasm [goid 5737] [evidence IDA]; membrane [goid 16020] [evidence IEA]; plasma membrane [goid 5886] [evidence IDA]	cytoskeleton organization and biogenesis [goid 7010] [evidence IDA]; regulation of cell shape [goid 8360] [evidence IDA]; cytoskeleton organization and biogenesis [goid 7010] [evidence IDA]; regulation of cell shape [goid 8360] [evidence IDA]; cytoskeleton organization and biogenesis [goid 7010] [evidence IDA]; regulation of cell shape [goid 8360] [evidence IDA]
4780152	0.325425	3.99913	0.000834339	0.516033	-0.664436	104069	Sncb	13	13qB1	Mus musculus synuclein, beta (Sncb), mRNA.	mitochondrion [goid 5739] [evidence IDA]; synaptosome [goid 19717] [evidence IDA]	dopamine metabolism [goid 42417] [evidence IGI]
5860010	0.298861	4.06257	0.00072419	0.516033	-0.556827	234857	Spire2	8	8qE1	Mus musculus spire homolog 2 (Drosophila) (Spire2), mRNA.			zinc ion binding [goid 8270] [evidence IEA]; molecular_function [goid 3674] [evidence ND ]
6250041	-0.470407	-4.0467	0.000750287	0.516033	-0.583711	NA	Lhx6
6650132	0.314406	3.97322	0.000884014	0.516033	-0.708458	NA	Celsr2
7160768	0.291206	4.03708	0.000766574	0.516033	-0.600027	NA	Mast1	8	8qC3		cytoskeleton [goid 5856] [evidence IEA]; membrane [goid 16020] [evidence IEA]; cytoskeleton [goid 5856] [evidence IEA]; membrane [goid 16020] [evidence IEA]	protein kinase cascade [goid 7243] [evidence ISS]; protein amino acid phosphorylation [goid 6468] [evidence ISS]; cytoskeleton organization and biogenesis [goid 7010] [evidence IDA]; protein kinase cascade [goid 7243] [evidence ISS]; protein amino acid phosphorylation [goid 6468] [evidence ISS]; cytoskeleton organization and biogenesis [goid 7010] [evidence IDA]	kinase activity [goid 16301] [evidence IEA]; transferase activity [goid 16740] [evidence IEA]; nucleotide binding [goid 166] [evidence IEA]; metal ion binding [goid 46872] [evidence IEA]; ATP binding [goid 5524] [evidence ISS]; magnesium ion binding [goid 287] [evidence ISS]; protein serine/threonine kinase activity [goid 4674] [evidence ISS]; protein binding [goid 5515] [evidence IPI]; kinase ac…
3940242	-0.336658	-3.94077	0.000950451	0.520049	-0.76367	NA	AA175286
4230639	-0.379267	-3.94428	0.000943043	0.520049	-0.757706	NA	C130072A16Rik
6380653	-0.301274	-3.93816	0.000956011	0.520049	-0.768117	NA	C330006D17Rik
1450356	-0.400848	-3.89383	0.00105552	0.549745	-0.84366	18213	Ntrk3	7	7qD3	Mus musculus neurotrophic tyrosine kinase, receptor, type 3 (Ntrk3), transcript variant 2, mRNA.	membrane [goid 16020] [evidence IEA]; cytoplasm [goid 5737] [evidence IDA]; membrane [goid 16020] [evidence IEA]; cytoplasm [goid 5737] [evidence IDA]	mechanoreceptor differentiation [goid 42490] [evidence IMP]; transmembrane receptor protein tyrosine kinase signaling pathway [goid 7169] [evidence IEA]; protein amino acid phosphorylation [goid 6468] [evidence IEA]; mechanoreceptor differentiation [goid 42490] [evidence IMP]; transmembrane receptor protein tyrosine kinase signaling pathway [goid 7169] [evidence IEA]; protein amino acid phosphory…	kinase activity [goid 16301] [evidence IEA]; transferase activity [goid 16740] [evidence IEA]; transmembrane receptor protein tyrosine kinase activity [goid 4714] [evidence IEA]; ATP binding [goid 5524] [evidence IEA]; receptor activity [goid 4872] [evidence IEA]; protein binding [goid 5515] [evidence IPI]; kinase activity [goid 16301] [evidence IEA]; transferase activity [goid 16740] [evidence I…
1580632	-0.337626	-3.89463	0.00105362	0.549745	-0.842286	NA	4921511I23Rik
1170523	-0.309019	-3.6508	0.00181605	0.550603	-1.25939	NA	Slc35d3
1260576	0.29486	3.65086	0.00181581	0.550603	-1.25929	244723	Olfm2	9	9qA3	Mus musculus olfactomedin 2 (Olfm2), mRNA.	membrane [goid 16020] [evidence IEA]; membrane [goid 16020] [evidence IEA]		latrotoxin receptor activity [goid 16524] [evidence IEA]; latrotoxin receptor activity [goid 16524] [evidence IEA]
130088	-0.300877	-3.82737	0.00122444	0.550603	-0.957111	NA	2310032M22Rik
1470725	-0.302563	-3.59551	0.00205434	0.550603	-1.35421	64378	Gpr88	3	3qG1	Mus musculus G-protein coupled receptor 88 (Gpr88), mRNA.	membrane [goid 16020] [evidence IEA]	signal transduction [goid 7165] [evidence IEA]	receptor activity [goid 4872] [evidence IEA]; signal transducer activity [goid 4871] [evidence IEA]; G-protein coupled receptor activity [goid 4930] [evidence ISS]; transmembrane receptor activity [goid 4888] [evidence ISS]
1500112	0.278914	3.61103	0.00198451	0.550603	-1.3276	NA	Dhh
1510132	-0.273382	-3.79669	0.00131127	0.550603	-1.00955	NA	6030408C04Rik
1660523	0.299645	3.87128	0.00111003	0.550603	-0.882121	13728	Mark2	19	19qA	Mus musculus MAP/microtubule affinity-regulating kinase 2 (Mark2), transcript variant 1, mRNA.	nucleus [goid 5634] [evidence IDA]; membrane [goid 16020] [evidence ISS]	protein kinase cascade [goid 7243] [evidence ISS]; establishment and/or maintenance of epithelial cell polarity [goid 45197] [evidence ISS]; cell differentiation [goid 30154] [evidence IEA]; development [goid 7275] [evidence IEA]; protein amino acid phosphorylation [goid 6468] [evidence ISS]	kinase activity [goid 16301] [evidence IEA]; transferase activity [goid 16740] [evidence IEA]; ATP binding [goid 5524] [evidence ISS]; protein serine/threonine kinase activity [goid 4674] [evidence ISS]; protein kinase activity [goid 4672] [evidence IEA]; nucleotide binding [goid 166] [evidence IEA]; metal ion binding [goid 46872] [evidence IEA]; magnesium ion binding [goid 287] [evidence ISS]
20630	0.349076	3.70551	0.00160733	0.550603	-1.16562	NA	Unc5c
2230603	0.381336	3.73878	0.00149228	0.550603	-1.10864	NA	Unc5c
240661	0.252938	3.64783	0.00182813	0.550603	-1.26449	14755	Pigq	17	17qA3.3	Mus musculus phosphatidylinositol glycan anchor biosynthesis, class Q (Pigq), mRNA.	membrane [goid 16020] [evidence IEA]	GPI anchor biosynthesis [goid 6506] [evidence IEA]	transferase activity, transferring glycosyl groups [goid 16757] [evidence IEA]; transferase activity [goid 16740] [evidence IEA]; phosphatidylinositol N-acetylglucosaminyltransferase activity [goid 17176] [evidence IEA]
2630437	-0.364302	-3.80645	0.00128299	0.550603	-0.992859	NA	4833446K15Rik
2690273	-0.270595	-3.75658	0.00143414	0.550603	-1.07817	NA	Itch
270450	-0.269407	-3.5969	0.00204798	0.550603	-1.35183	66552	2010106G01Rik	2	2qF1	Mus musculus RIKEN cDNA 2010106G01 gene (2010106G01Rik), mRNA.	membrane [goid 16020] [evidence IEA]; integral to membrane [goid 16021] [evidence IEA]; membrane [goid 16020] [evidence IEA]; integral to membrane [goid 16021] [evidence IEA]; membrane [goid 16020] [evidence IEA]; integral to membrane [goid 16021] [evidence IEA]		receptor activity [goid 4872] [evidence IEA]; hydrolase activity [goid 16787] [evidence IEA]; D-alanyl-D-alanine endopeptidase activity [goid 8717] [evidence IEA]; peptidase activity [goid 8233] [evidence IEA]; receptor activity [goid 4872] [evidence IEA]; hydrolase activity [goid 16787] [evidence IEA]; D-alanyl-D-alanine endopeptidase activity [goid 8717] [evidence IEA]; peptidase activity [goid…
2710100	0.349954	3.75376	0.00144322	0.550603	-1.083	NA	BC037527
2900044	0.268552	3.67999	0.00170155	0.550603	-1.20936	NA	D430036N24Rik
3390328	0.303852	3.82365	0.00123463	0.550603	-0.963456	NA	Slc35c1	2	2qE1
4220170	-0.423131	-3.64092	0.00185655	0.550603	-1.27635	114142	Foxp2	6	6qA1	Mus musculus forkhead box P2 (Foxp2), transcript variant 2, mRNA.	nucleus [goid 5634] [evidence IEA]; intracellular [goid 5622] [evidence IEA]; nucleus [goid 5634] [evidence IEA]; intracellular [goid 5622] [evidence IEA]; nucleus [goid 5634] [evidence IEA]; intracellular [goid 5622] [evidence IEA]	regulation of transcription, DNA-dependent [goid 6355] [evidence IEA]; negative regulation of transcription [goid 16481] [evidence IDA]; transcription [goid 6350] [evidence IEA]; negative regulation of transcription from RNA polymerase II promoter [goid 122] [evidence IDA]; regulation of transcription, DNA-dependent [goid 6355] [evidence IEA]; negative regulation of transcription [goid 16481] [ev…	protein homodimerization activity [goid 42803] [evidence IPI]; transcription factor activity [goid 3700] [evidence IEA]; protein heterodimerization activity [goid 46982] [evidence IPI]; DNA binding [goid 3677] [evidence IDA]; protein binding [goid 5515] [evidence IPI]; sequence-specific DNA binding [goid 43565] [evidence IEA]; transcriptional repressor activity [goid 16564] [evidence IDA]; zinc i…
4290112	-0.276561	-3.58788	0.00208958	0.550603	-1.3673	NA	Foxo1
450390	-0.36062	-3.5874	0.00209184	0.550603	-1.36813	NA	C920008O22Rik
4610270	-0.278792	-3.69415	0.00164862	0.550603	-1.18509	NA	Gas2l3
4780619	-0.345744	-3.80939	0.0012746	0.550603	-0.987836	NA	Syt6
4830142	-0.275516	-3.80697	0.00128151	0.550603	-0.991972	NA	Rapgef5
4880491	0.294898	3.81593	0.00125612	0.550603	-0.976659	NA	1810041L15Rik
4920670	-0.347821	-3.60936	0.00199189	0.550603	-1.33046	NA	D330004C03Rik
50139	0.347687	3.64532	0.0018384	0.550603	-1.26879	21420	Tcfap2c	2	2qH3	Mus musculus transcription factor AP-2, gamma (Tcfap2c), mRNA.	transcription factor complex [goid 5667] [evidence IEA]; nucleus [goid 5634] [evidence IDA]; transcription factor complex [goid 5667] [evidence IEA]; nucleus [goid 5634] [evidence IDA]; transcription factor complex [goid 5667] [evidence IEA]; nucleus [goid 5634] [evidence IDA]	transcription [goid 6350] [evidence IEA]; regulation of transcription from RNA polymerase II promoter [goid 6357] [evidence IDA]; cell differentiation [goid 30154] [evidence IMP]; regulation of transcription, DNA-dependent [goid 6355] [evidence IMP]; transcription [goid 6350] [evidence IEA]; regulation of transcription from RNA polymerase II promoter [goid 6357] [evidence IDA]; cell differentiati…	transcription factor activity [goid 3700] [evidence IMP]; DNA binding [goid 3677] [evidence IDA]; protein binding [goid 5515] [evidence IPI]; transcription factor activity [goid 3700] [evidence IMP]; DNA binding [goid 3677] [evidence IDA]; protein binding [goid 5515] [evidence IPI]; transcription factor activity [goid 3700] [evidence IMP]; DNA binding [goid 3677] [evidence IDA]; protein binding […
5050471	0.299852	3.61362	0.00197306	0.550603	-1.32315	68404	Nrn1	13	13qA3.3	Mus musculus neuritin 1 (Nrn1), mRNA.		axonogenesis [goid 7409] [evidence ISS]
5130494	-0.323557	-3.88248	0.00108261	0.550603	-0.863016	109624	Cald1	6	6qB1	Mus musculus caldesmon 1 (Cald1), mRNA.	actin cap [goid 30478] [evidence IDA]; membrane fraction [goid 5624] [evidence IDA]	muscle contraction [goid 6936] [evidence IEA]; regulation of smooth muscle contraction [goid 6940] [evidence TAS]	calmodulin binding [goid 5516] [evidence IEA]; actin binding [goid 3779] [evidence TAS]; myosin binding [goid 17022] [evidence IEA]
5670328	0.323519	3.60124	0.0020283	0.550603	-1.3444	NA	Atp1b2
5700767	-0.352419	-3.74465	0.00147286	0.550603	-1.09859	NA	9330158N06Rik
5820278	-0.36343	-3.60593	0.00200719	0.550603	-1.33635	NA	B930066N23Rik
5820538	0.411158	3.61188	0.00198074	0.550603	-1.32614	NA	LOC235480
5820634	-0.35938	-3.6694	0.00174225	0.550603	-1.22751	17755	Mtap1b	13	13qD1	Mus musculus microtubule-associated protein 1 B (Mtap1b), mRNA.	microtubule associated complex [goid 5875] [evidence TAS]; microtubule [goid 5874] [evidence IEA]; microtubule associated complex [goid 5875] [evidence TAS]; microtubule [goid 5874] [evidence IEA]; microtubule associated complex [goid 5875] [evidence TAS]; microtubule [goid 5874] [evidence IEA]; microtubule associated complex [goid 5875] [evidence TAS]; microtubule [goid 5874] [evidence IEA]	microtubule-based process [goid 7017] [evidence TAS]; microtubule bundle formation [goid 1578] [evidence IMP]; microtubule-based process [goid 7017] [evidence TAS]; microtubule bundle formation [goid 1578] [evidence IMP]; microtubule-based process [goid 7017] [evidence TAS]; microtubule bundle formation [goid 1578] [evidence IMP]; microtubule-based process [goid 7017] [evidence TAS]; microtubule …	cytoskeletal regulatory protein binding [goid 5519] [evidence TAS]; cytoskeletal regulatory protein binding [goid 5519] [evidence TAS]; cytoskeletal regulatory protein binding [goid 5519] [evidence TAS]; cytoskeletal regulatory protein binding [goid 5519] [evidence TAS]
5910068	-0.29058	-3.62181	0.00193735	0.550603	-1.3091	NA	Lmo4
630437	-0.279823	-3.63403	0.00188529	0.550603	-1.28816	230484	Usp1	4	4qC6	Mus musculus ubiquitin specific peptdiase 1 (Usp1), mRNA.		ubiquitin-dependent protein catabolism [goid 6511] [evidence IEA]; ubiquitin-dependent protein catabolism [goid 6511] [evidence IEA]; ubiquitin-dependent protein catabolism [goid 6511] [evidence IEA]; ubiquitin-dependent protein catabolism [goid 6511] [evidence IEA]	cysteine-type endopeptidase activity [goid 4197] [evidence IEA]; ubiquitin thiolesterase activity [goid 4221] [evidence IEA]; peptidase activity [goid 8233] [evidence IEA]; cysteine-type endopeptidase activity [goid 4197] [evidence IEA]; ubiquitin thiolesterase activity [goid 4221] [evidence IEA]; peptidase activity [goid 8233] [evidence IEA]; cysteine-type endopeptidase activity [goid 4197] [evi…
6380349	0.298377	3.66013	0.00177864	0.550603	-1.24339	18483	Palm	10	10qC1	Mus musculus paralemmin (Palm), mRNA.	cytoplasm [goid 5737] [evidence IDA]; membrane [goid 16020] [evidence IEA]; plasma membrane [goid 5886] [evidence IDA]; cytoplasm [goid 5737] [evidence IDA]; membrane [goid 16020] [evidence IEA]; plasma membrane [goid 5886] [evidence IDA]; cytoplasm [goid 5737] [evidence IDA]; membrane [goid 16020] [evidence IEA]; plasma membrane [goid 5886] [evidence IDA]	cytoskeleton organization and biogenesis [goid 7010] [evidence IDA]; regulation of cell shape [goid 8360] [evidence IDA]; cytoskeleton organization and biogenesis [goid 7010] [evidence IDA]; regulation of cell shape [goid 8360] [evidence IDA]; cytoskeleton organization and biogenesis [goid 7010] [evidence IDA]; regulation of cell shape [goid 8360] [evidence IDA]
650626	0.318423	3.64296	0.00184808	0.550603	-1.27283	73170	Rwdd3	3		Mus musculus RWD domain containing 3 (Rwdd3), mRNA.
6510653	0.410236	3.60301	0.00202028	0.550603	-1.34135	11771	Ap2a1	7	7qB4	Mus musculus adaptor protein complex AP-2, alpha 1 subunit (Ap2a1), transcript variant 2, mRNA.	secretory granule [goid 30141] [evidence TAS]; membrane coat [goid 30117] [evidence IDA]; coated pit [goid 5905] [evidence IEA]; AP-2 adaptor complex [goid 30122] [evidence ISS]; clathrin coat of trans-Golgi network vesicle [goid 30130] [evidence ISS]	vesicle-mediated transport [goid 16192] [evidence TAS]; intracellular protein transport [goid 6886] [evidence TAS]; endocytosis [goid 6897] [evidence ISS]; transport [goid 6810] [evidence IEA]; protein transport [goid 15031] [evidence IEA]; Golgi to endosome transport [goid 6895] [evidence ISS]; protein complex assembly [goid 6461] [evidence IEA]	binding [goid 5488] [evidence IEA]; structural molecule activity [goid 5198] [evidence IEA]; protein binding [goid 5515] [evidence IPI]
6560328	0.271007	3.78353	0.00135039	0.550603	-1.03206	NA	Usp2
6620079	-0.346508	-3.83145	0.00121332	0.550603	-0.950134	NA	Egr1
6770722	-0.329735	-3.68536	0.0016813	0.550603	-1.20016	NA	Kcnq5
6840458	-0.315671	-3.75408	0.00144219	0.550603	-1.08246	229663	Csde1	3	3qF2.2	Mus musculus cold shock domain containing E1, RNA binding (Csde1), mRNA.	mitochondrial inner membrane [goid 5743] [evidence IDA]; mitochondrial inner membrane [goid 5743] [evidence IDA]; mitochondrial inner membrane [goid 5743] [evidence IDA]	regulation of transcription, DNA-dependent [goid 6355] [evidence IEA]; regulation of transcription, DNA-dependent [goid 6355] [evidence IEA]; regulation of transcription, DNA-dependent [goid 6355] [evidence IEA]	RNA binding [goid 3723] [evidence IEA]; DNA binding [goid 3677] [evidence IEA]; RNA binding [goid 3723] [evidence IEA]; DNA binding [goid 3677] [evidence IEA]; RNA binding [goid 3723] [evidence IEA]; DNA binding [goid 3677] [evidence IEA]
6900035	-0.407179	-3.77004	0.00139169	0.550603	-1.05514	18994	Pou3f4	X	XqE1	Mus musculus POU domain, class 3, transcription factor 4 (Pou3f4), mRNA.	transcription factor complex [goid 5667] [evidence IEA]	regulation of transcription [goid 45449] [evidence IEA]; regulation of transcription, DNA-dependent [goid 6355] [evidence IEA]; transcription [goid 6350] [evidence IEA]	sequence-specific DNA binding [goid 43565] [evidence IEA]; transcription factor activity [goid 3700] [evidence IEA]
7040546	0.302575	3.67674	0.00171392	0.550603	-1.21492	381201	Gm962	19	19qA	Mus musculus gene model 962, (NCBI) (Gm962), mRNA.
7160162	-0.264683	-3.60231	0.00202344	0.550603	-1.34255	103554	Psme4	11	11qA4	Mus musculus proteasome (prosome, macropain) activator subunit 4 (Psme4), mRNA.	protein complex [goid 43234] [evidence IEA]; cytosol [goid 5829] [evidence IEA]
730041	-0.343613	-3.66182	0.00177198	0.550603	-1.24051	12564	Cdh8	8	8qD1	Mus musculus cadherin 8 (Cdh8), transcript variant 1, mRNA.	membrane [goid 16020] [evidence IEA]; membrane [goid 16020] [evidence IEA]	homophilic cell adhesion [goid 7156] [evidence IEA]; cell adhesion [goid 7155] [evidence IEA]; homophilic cell adhesion [goid 7156] [evidence IEA]; cell adhesion [goid 7155] [evidence IEA]	calcium ion binding [goid 5509] [evidence IEA]; protein binding [goid 5515] [evidence IEA]; calcium ion binding [goid 5509] [evidence IEA]; protein binding [goid 5515] [evidence IEA]
7650341	0.365717	3.59649	0.00204989	0.550603	-1.35254	18754	Prkce	17	17qE4	Mus musculus protein kinase C, epsilon (Prkce), mRNA.	nucleus [goid 5634] [evidence IDA]; cytoplasm [goid 5737] [evidence IDA]	regulation of peptidyl-tyrosine phosphorylation [goid 50730] [evidence IMP]; intracellular signaling cascade [goid 7242] [evidence IEA]; chemosensory behavior [goid 7635] [evidence TAS]; protein amino acid phosphorylation [goid 6468] [evidence IDA]	kinase activity [goid 16301] [evidence IEA]; transferase activity [goid 16740] [evidence IEA]; nucleotide binding [goid 166] [evidence IEA]; zinc ion binding [goid 8270] [evidence IEA]; metal ion binding [goid 46872] [evidence IEA]; ATP binding [goid 5524] [evidence IEA]; protein serine/threonine kinase activity [goid 4674] [evidence IEA]; calcium-independent protein kinase C activity [goid 4699]…
5080437	0.296016	3.56774	0.00218551	0.569138	-1.40186	NA	9430073L23Rik
4220148	-0.266506	-3.55533	0.00224679	0.578938	-1.42315	NA	LOC213014
4560670	-0.281785	-3.54097	0.00231978	0.580049	-1.44778	NA	Ppap2c
6250670	-0.260025	-3.54113	0.00231894	0.580049	-1.4475	NA	Ercc6
6620632	-0.305498	-3.54051	0.00232219	0.580049	-1.44858	NA	Cdh8
1580088	-0.309128	-3.51895	0.00243634	0.58154	-1.48556	NA	Ccnd2
2710092	-0.27966	-3.52771	0.00238927	0.58154	-1.47053	NA	9030624G23Rik
2900403	-0.412256	-3.51974	0.00243209	0.58154	-1.48421	NA	E430033B07Rik
3460369	0.264397	3.51266	0.0024707	0.58154	-1.49636	NA	Klc2
510722	0.31662	3.52228	0.00241833	0.58154	-1.47984	21814	Tgfbr3	5	5qE5	Mus musculus transforming growth factor, beta receptor III (Tgfbr3), mRNA.	membrane [goid 16020] [evidence IEA]
7650360	0.312089	3.51404	0.00246309	0.58154	-1.49398	77889	Lbh	17	17qE1.3	Mus musculus limb-bud and heart (Lbh), mRNA.	nucleus [goid 5634] [evidence IDA]; nucleus [goid 5634] [evidence IDA]	regulation of transcription from RNA polymerase II promoter [goid 6357] [evidence IDA]; regulation of transcription from RNA polymerase II promoter [goid 6357] [evidence IDA]	transcriptional activator activity [goid 16563] [evidence IDA]; transcriptional activator activity [goid 16563] [evidence IDA]
2940156	-0.384489	-3.49155	0.00258948	0.603695	-1.53256	13209	Ddx6	9	9qA5.2	Mus musculus DEAD (Asp-Glu-Ala-Asp) box polypeptide 6 (Ddx6), mRNA.	nucleus [goid 5634] [evidence IEA]; intracellular [goid 5622] [evidence IEA]; nucleus [goid 5634] [evidence IEA]; intracellular [goid 5622] [evidence IEA]		ATP-dependent helicase activity [goid 8026] [evidence IEA]; RNA helicase activity [goid 3724] [evidence IEA]; hydrolase activity [goid 16787] [evidence IEA]; RNA binding [goid 3723] [evidence IEA]; nucleotide binding [goid 166] [evidence IEA]; helicase activity [goid 4386] [evidence IEA]; ATP binding [goid 5524] [evidence IEA]; nucleic acid binding [goid 3676] [evidence IEA]; ATP-dependent helica…
3180315	0.265962	3.4819	0.00264568	0.610978	-1.54912	54003	Nell2	15	15qE3-qF1	Mus musculus NEL-like 2 (chicken) (Nell2), mRNA.		cell adhesion [goid 7155] [evidence IEA]; cell adhesion [goid 7155] [evidence IEA]; cell adhesion [goid 7155] [evidence IEA]; cell adhesion [goid 7155] [evidence IEA]	calcium ion binding [goid 5509] [evidence IEA]; structural molecule activity [goid 5198] [evidence IEA]; calcium ion binding [goid 5509] [evidence IEA]; structural molecule activity [goid 5198] [evidence IEA]; calcium ion binding [goid 5509] [evidence IEA]; structural molecule activity [goid 5198] [evidence IEA]; calcium ion binding [goid 5509] [evidence IEA]; structural molecule activity [goid 5…
1740112	-0.295244	-3.45998	0.00277782	0.615321	-1.58672	NA	Loxl1
3440386	0.247431	3.45798	0.00279017	0.615321	-1.59014	NA	Zbtb8
5420673	-0.327385	-3.46218	0.00276425	0.615321	-1.58294	NA	Ash1l
5860609	0.344391	3.46665	0.00273697	0.615321	-1.57529	NA	Ncald
6650632	0.252693	3.46881	0.00272381	0.615321	-1.57157	68229	AI846148	19	19qA	Mus musculus expressed sequence AI846148 (AI846148), mRNA. XM_896219 XM_896224 XM_912777 XM_922495 XM_922500 XM_922504 XM_922508 XM_922513 XM_922518
6400291	0.278683	3.44678	0.0028605	0.620862	-1.60935	170749	Mtmr4	11	11qC	Mus musculus myotubularin related protein 4 (Mtmr4), mRNA.		phospholipid dephosphorylation [goid 46839] [evidence IEA]	inositol or phosphatidylinositol phosphatase activity [goid 4437] [evidence IEA]; hydrolase activity [goid 16787] [evidence IEA]
7400717	0.33152	3.44591	0.00286603	0.620862	-1.61084	170638	Hpcal4	4	4qD2.2	Mus musculus hippocalcin-like 4 (Hpcal4), mRNA.
6650717	-0.27906	-3.43149	0.00295936	0.635458	-1.63558	NA	1700030G05Rik
1070673	0.223033	3.19831	0.0049573	0.644017	-2.03445	71529	9030409G11Rik	4	4qE1	Mus musculus RIKEN cDNA 9030409G11 gene (9030409G11Rik), mRNA.	cornified envelope [goid 1533] [evidence ISS]; desmosome [goid 30057] [evidence ISS]
1090243	-0.354518	-3.34999	0.00354582	0.644017	-1.77524	NA	HPBRII4
1240433	0.225143	3.3183	0.00380353	0.644017	-1.82948	208727	4932408F19Rik	1	1qD	Mus musculus histone deacetylase 4 (Hdac4), mRNA.	nucleus [goid 5634] [evidence IC ]	skeletal development [goid 1501] [evidence IMP]; negative regulation of transcription from RNA polymerase II promoter [goid 122] [evidence IGI]; negative regulation of cell proliferation [goid 8285] [evidence IMP]; negative regulation of transcription, DNA-dependent [goid 45892] [evidence IMP]	transcriptional repressor activity [goid 16564] [evidence IMP]; DNA binding [goid 3677] [evidence IDA]; protein binding [goid 5515] [evidence IPI]
1440020	0.284253	3.23492	0.00457301	0.644017	-1.972	266632	Irak4	15	15qE3	Mus musculus interleukin-1 receptor-associated kinase 4 (Irak4), mRNA.		signal transduction [goid 7165] [evidence IEA]; protein amino acid phosphorylation [goid 6468] [evidence IEA]; cytokine production [goid 1816] [evidence IDA]; cytokine and chemokine mediated signaling pathway [goid 19221] [evidence IDA]; signal transduction [goid 7165] [evidence IEA]; protein amino acid phosphorylation [goid 6468] [evidence IEA]; cytokine production [goid 1816] [evidence IDA]; cy…	protein kinase activity [goid 4672] [evidence IEA]; protein binding [goid 5515] [evidence IEA]; protein serine/threonine kinase activity [goid 4674] [evidence IEA]; magnesium ion binding [goid 287] [evidence IEA]; receptor activity [goid 4872] [evidence IEA]; interleukin-1 receptor binding [goid 5149] [evidence IPI]; ATP binding [goid 5524] [evidence IEA]; nucleotide binding [goid 166] [evidence …
1440477	-0.244267	-3.20856	0.00484664	0.644017	-2.01697	117589	Asb7	7	7qC	Mus musculus ankyrin repeat and SOCS box-containing protein 7 (Asb7), transcript variant 2, mRNA.		intracellular signaling cascade [goid 7242] [evidence IEA]; intracellular signaling cascade [goid 7242] [evidence IEA]	molecular_function [goid 3674] [evidence ND ]; molecular_function [goid 3674] [evidence ND ]
150541	0.377854	3.23632	0.00455884	0.644017	-1.96959	23917	Impdh1	6	6qA3.3	Mus musculus inosine 5'-phosphate dehydrogenase 1 (Impdh1), mRNA.		purine nucleotide biosynthesis [goid 6164] [evidence IMP]; GMP biosynthesis [goid 6177] [evidence IEA]; lymphocyte proliferation [goid 46651] [evidence IMP]; purine nucleotide biosynthesis [goid 6164] [evidence IMP]; GMP biosynthesis [goid 6177] [evidence IEA]; lymphocyte proliferation [goid 46651] [evidence IMP]; purine nucleotide biosynthesis [goid 6164] [evidence IMP]; GMP biosynthesis [goid 6…	oxidoreductase activity [goid 16491] [evidence IEA]; metal ion binding [goid 46872] [evidence IEA]; potassium ion binding [goid 30955] [evidence IEA]; IMP dehydrogenase activity [goid 3938] [evidence IDA]; catalytic activity [goid 3824] [evidence IEA]; oxidoreductase activity [goid 16491] [evidence IEA]; metal ion binding [goid 46872] [evidence IEA]; potassium ion binding [goid 30955] [evidence I…
1510273	0.255629	3.19676	0.00497424	0.644017	-2.03709	17425	Foxk1	5	5qG2	Mus musculus forkhead box K1 (Foxk1), mRNA.	nucleus [goid 5634] [evidence IEA]; nucleus [goid 5634] [evidence IEA]	transcription [goid 6350] [evidence IEA]; Mo-molybdopterin cofactor biosynthesis [goid 6777] [evidence IEA]; regulation of transcription from RNA polymerase II promoter [goid 6357] [evidence IDA]; cell differentiation [goid 30154] [evidence IEA]; regulation of transcription, DNA-dependent [goid 6355] [evidence IEA]; development [goid 7275] [evidence IEA]; transcription [goid 6350] [evidence IEA];…	sequence-specific DNA binding [goid 43565] [evidence IEA]; transcription factor activity [goid 3700] [evidence IEA]; DNA binding [goid 3677] [evidence IDA]; protein binding [goid 5515] [evidence IPI]; sequence-specific DNA binding [goid 43565] [evidence IEA]; transcription factor activity [goid 3700] [evidence IEA]; DNA binding [goid 3677] [evidence IDA]; protein binding [goid 5515] [evidence IPI]
1660739	0.270851	3.29104	0.00403993	0.644017	-1.87611	225913	BC021917	19	19qA	Mus musculus dihydroxyacetone kinase 2 homolog (yeast) (Dak), mRNA.		glycerol metabolism [goid 6071] [evidence IEA]	kinase activity [goid 16301] [evidence IEA]; ATP binding [goid 5524] [evidence IEA]; transferase activity [goid 16740] [evidence IEA]; lyase activity [goid 16829] [evidence IEA]; glycerone kinase activity [goid 4371] [evidence IEA]; nucleotide binding [goid 166] [evidence IEA]
1690600	0.233189	3.27509	0.00418494	0.644017	-1.90338	192734	AI646023	10	10qC1	Mus musculus expressed sequence AI646023 (AI646023), mRNA.			transferase activity [goid 16740] [evidence IEA]
1770324	0.247913	3.32001	0.00378916	0.644017	-1.82655	22417	Wnt4	4	4qD3	Mus musculus wingless-related MMTV integration site 4 (Wnt4), mRNA.		tube morphogenesis [goid 35239] [evidence IMP]; hormone metabolism [goid 42445] [evidence IMP]; smooth muscle cell differentiation [goid 51145] [evidence IMP]; cell-cell signaling [goid 7267] [evidence TAS]; male gonad development [goid 8584] [evidence IMP]; female gonad development [goid 8585] [evidence IMP]; signal transduction [goid 7165] [evidence TAS]; negative regulation of cell differentia…	signal transducer activity [goid 4871] [evidence IEA]; protein binding [goid 5515] [evidence IPI]; receptor binding [goid 5102] [evidence TAS]; signal transducer activity [goid 4871] [evidence IEA]; protein binding [goid 5515] [evidence IPI]; receptor binding [goid 5102] [evidence TAS]
1780255	0.238323	3.25194	0.00440443	0.644017	-1.94293	NA	Pace4
1780280	-0.245043	-3.35035	0.00354301	0.644017	-1.77463	NA	5830455K21Rik
2030091	-0.351457	-3.20237	0.00491317	0.644017	-2.02753	93686	Rbm9	15	15qD3-qE1	Mus musculus RNA binding motif protein 9 (Rbm9), transcript variant 1, mRNA.	nucleus [goid 5634] [evidence ISS]; nucleus [goid 5634] [evidence ISS]	estrogen receptor signaling pathway [goid 30520] [evidence ISS]; negative regulation of transcription [goid 16481] [evidence ISS]; regulation of cell proliferation [goid 42127] [evidence ISS]; RNA metabolism [goid 16070] [evidence ISS]; estrogen receptor signaling pathway [goid 30520] [evidence ISS]; negative regulation of transcription [goid 16481] [evidence ISS]; regulation of cell proliferatio…	protein binding [goid 5515] [evidence IPI]; transcription factor binding [goid 8134] [evidence ISS]; nucleic acid binding [goid 3676] [evidence IEA]; nucleotide binding [goid 166] [evidence IEA]; transcription corepressor activity [goid 3714] [evidence ISS]; RNA binding [goid 3723] [evidence ISS]; protein binding [goid 5515] [evidence IPI]; transcription factor binding [goid 8134] [evidence ISS];…
2350482	0.242213	3.24805	0.00444243	0.644017	-1.94958	12455	Ccnt1	15	15qF1	Mus musculus cyclin T1 (Ccnt1), mRNA.	nucleus [goid 5634] [evidence IDA]; nucleolus [goid 5730] [evidence ISS]	transcription [goid 6350] [evidence IEA]; regulation of transcription [goid 45449] [evidence IEA]; regulation of transcription, DNA-dependent [goid 6355] [evidence IEA]; cell cycle [goid 7049] [evidence IEA]; protein amino acid phosphorylation [goid 6468] [evidence ISS]; cell division [goid 51301] [evidence IEA]	cyclin-dependent protein kinase regulator activity [goid 16538] [evidence IEA]; snRNA binding [goid 17069] [evidence IDA]; protein kinase binding [goid 19901] [evidence IEA]; DNA binding [goid 3677] [evidence ISS]; protein binding [goid 5515] [evidence ISS]
2450259	-0.271929	-3.29762	0.00398163	0.644017	-1.86486	NA	9130422G05Rik
2480202	-0.324339	-3.29322	0.00402052	0.644017	-1.87238	108079	Prkaa2	4	4qC6	Mus musculus protein kinase, AMP-activated, alpha 2 catalytic subunit (Prkaa2), mRNA.	nucleus [goid 5634] [evidence IDA]	response to stress [goid 6950] [evidence TAS]; protein amino acid phosphorylation [goid 6468] [evidence IEA]	kinase activity [goid 16301] [evidence IEA]; AMP-activated protein kinase activity [goid 4679] [evidence TAS]; transferase activity [goid 16740] [evidence IEA]; nucleotide binding [goid 166] [evidence IEA]; ATP binding [goid 5524] [evidence IEA]; protein serine/threonine kinase activity [goid 4674] [evidence IEA]
2630709	0.240776	3.22957	0.00462731	0.644017	-1.98113	NA	C230015M18Rik
2680202	-0.289803	-3.38132	0.00330792	0.644017	-1.72157	66578	2610039C10Rik	16	16qC3.3	Mus musculus RIKEN cDNA 2610039C10 gene (2610039C10Rik), mRNA.
2680553	-0.247823	-3.18741	0.00507763	0.644017	-2.05301	56711	Plag1	4	4qA1	Mus musculus pleiomorphic adenoma gene 1 (Plag1), mRNA.	nucleus [goid 5634] [evidence IEA]; intracellular [goid 5622] [evidence IEA]		zinc ion binding [goid 8270] [evidence IEA]; metal ion binding [goid 46872] [evidence IEA]; nucleic acid binding [goid 3676] [evidence IEA]
270736	-0.288165	-3.23475	0.00457472	0.644017	-1.97229	223227	Sox21	14	14qE4	Mus musculus SRY-box containing gene 21 (Sox21), mRNA.	nucleus [goid 5634] [evidence IC ]; chromatin [goid 785] [evidence IEA]; nucleus [goid 5634] [evidence IC ]; chromatin [goid 785] [evidence IEA]	regulation of transcription, DNA-dependent [goid 6355] [evidence IEA]; transcription [goid 6350] [evidence IEA]; regulation of transcription, DNA-dependent [goid 6355] [evidence IEA]; transcription [goid 6350] [evidence IEA]	transcription factor activity [goid 3700] [evidence IDA]; DNA binding [goid 3677] [evidence IEA]; transcription factor activity [goid 3700] [evidence IDA]; DNA binding [goid 3677] [evidence IEA]
2710131	0.267463	3.32592	0.00373997	0.644017	-1.81645	NA	Cyln2
2750376	0.299665	3.3342	0.00367199	0.644017	-1.80226	320840	Negr1	3	3qH4	Mus musculus neuronal growth regulator 1 (Negr1), transcript variant 1, mRNA.	membrane [goid 16020] [evidence IEA]	cell adhesion [goid 7155] [evidence IEA]	protein binding [goid 5515] [evidence IEA]; GPI anchor binding [goid 48503] [evidence IEA]
2750682	-0.296861	-3.36122	0.00345868	0.644017	-1.75601	NA	Chd1
2810246	0.291981	3.23861	0.00453589	0.644017	-1.96569	232791	Cnot3	7	7qA1	Mus musculus CCR4-NOT transcription complex, subunit 3 (Cnot3), mRNA.	nucleus [goid 5634] [evidence IEA]	transcription [goid 6350] [evidence IEA]; regulation of transcription, DNA-dependent [goid 6355] [evidence IEA]; regulation of transcription [goid 45449] [evidence IEA]	protein binding [goid 5515] [evidence IPI]; transcription regulator activity [goid 30528] [evidence IEA]
290343	-0.271481	-3.33212	0.00368896	0.644017	-1.80583	18477	Prdx1	4	4qD1	Mus musculus peroxiredoxin 1 (Prdx1), mRNA.		regulation of NF-kappaB import into nucleus [goid 42345] [evidence IMP]; response to oxidative stress [goid 6979] [evidence IMP]; regulation of NF-kappaB import into nucleus [goid 42345] [evidence IMP]; response to oxidative stress [goid 6979] [evidence IMP]	peroxidase activity [goid 4601] [evidence IEA]; antioxidant activity [goid 16209] [evidence IEA]; oxidoreductase activity [goid 16491] [evidence IEA]; peroxidase activity [goid 4601] [evidence IEA]; antioxidant activity [goid 16209] [evidence IEA]; oxidoreductase activity [goid 16491] [evidence IEA]
2970373	-0.225887	-3.19271	0.00501877	0.644017	-2.04399	NA	Ube3a
3290463	-0.256567	-3.40685	0.00312576	0.644017	-1.67782	333605	Frmpd4	X	XqF5	Mus musculus FERM and PDZ domain containing 4 (Frmpd4), mRNA.	cytoskeleton [goid 5856] [evidence IEA]		protein binding [goid 5515] [evidence IEA]
3400646	0.256422	3.37117	0.00338319	0.644017	-1.73895	NA	Ptpns1
3450452	-0.288858	-3.2815	0.00412604	0.644017	-1.89242	100737	Dcun1d4	5	5qC3.3	Mus musculus DCN1, defective in cullin neddylation 1, domain containing 4 (S. cerevisiae) (Dcun1d4), mRNA.
3450754	0.269762	3.34961	0.00354877	0.644017	-1.77588	NA	9330151E04Rik
3460220	0.264706	3.29264	0.00402572	0.644017	-1.87338	19228	Pthr1	9	9qF2	Mus musculus parathyroid hormone receptor 1 (Pthr1), mRNA.	integral to membrane [goid 16021] [evidence IEA]; membrane [goid 16020] [evidence IEA]; integral to membrane [goid 16021] [evidence IEA]; membrane [goid 16020] [evidence IEA]; integral to membrane [goid 16021] [evidence IEA]; membrane [goid 16020] [evidence IEA]	G-protein signaling, adenylate cyclase activating pathway [goid 7189] [evidence IMP]; positive regulation of cell proliferation [goid 8284] [evidence IGI]; G-protein coupled receptor protein signaling pathway [goid 7186] [evidence IEA]; bone mineralization [goid 30282] [evidence IMP]; G-protein signaling, coupled to IP3 second messenger (phospholipase C activating) [goid 7200] [evidence IMP]; neg…	receptor activity [goid 4872] [evidence IEA]; G-protein coupled receptor activity [goid 4930] [evidence IEA]; signal transducer activity [goid 4871] [evidence IEA]; parathyroid hormone receptor activity [goid 4991] [evidence TAS]; receptor activity [goid 4872] [evidence IEA]; G-protein coupled receptor activity [goid 4930] [evidence IEA]; signal transducer activity [goid 4871] [evidence IEA]; par…
3460348	-0.238235	-3.27314	0.00420301	0.644017	-1.90672	NA	Capza2
3520017	0.257491	3.2708	0.00422474	0.644017	-1.91071	NA	C030027L06Rik
3520689	-0.26089	-3.23901	0.00453195	0.644017	-1.96502	NA	9030612M13Rik
3780192	0.260704	3.30346	0.00393047	0.644017	-1.85486	23912	Rhof	5	5qF	Mus musculus ras homolog gene family, member f (Rhof), mRNA.	membrane [goid 16020] [evidence IEA]; cytoskeleton [goid 5856] [evidence IEA]; intracellular [goid 5622] [evidence IEA]		nucleotide binding [goid 166] [evidence IEA]
3840075	0.264915	3.35317	0.00352089	0.644017	-1.76978	NA	Dnajc7
3990634	-0.240132	-3.42002	0.00303573	0.644017	-1.65525	NA	A930026L03Rik
4010437	-0.277607	-3.2124	0.00480572	0.644017	-2.01041	NA	Lhcgr
4120537	-0.28299	-3.20801	0.00485251	0.644017	-2.01791	320609	D330017J20Rik	6	6qA3.3	Mus musculus RIKEN cDNA D330017J20 gene (D330017J20Rik), transcript variant 2, mRNA. XM_899022 XM_909461 XM_921304 XM_921310 XM_921314 XM_921319 XM_921325
4210273	-0.268721	-3.34442	0.00358981	0.644017	-1.78477	74100	0710001E13Rik	9	9qF3	Mus musculus cyclic AMP-regulated phosphoprotein, 21 (Arpp21), transcript variant 1, mRNA.	cytoplasm [goid 5737] [evidence TAS]; cytoplasm [goid 5737] [evidence TAS]		molecular_function [goid 3674] [evidence ND ]; nucleic acid binding [goid 3676] [evidence IEA]; protein phosphatase type 1 regulator activity [goid 8599] [evidence IEA]; molecular_function [goid 3674] [evidence ND ]; nucleic acid binding [goid 3676] [evidence IEA]; protein phosphatase type 1 regulator activity [goid 8599] [evidence IEA]
4210327	-0.269609	-3.26925	0.00423927	0.644017	-1.91336	16601	Bteb1	19	19qB	Mus musculus Kruppel-like factor 9 (Klf9), mRNA.	intracellular [goid 5622] [evidence IEA]; nucleus [goid 5634] [evidence IDA]	regulation of transcription, DNA-dependent [goid 6355] [evidence IEA]; regulation of transcription [goid 45449] [evidence IDA]; transcription [goid 6350] [evidence IEA]; embryo implantation [goid 7566] [evidence IDA]; progesterone receptor signaling pathway [goid 50847] [evidence IDA]	transcription regulator activity [goid 30528] [evidence IDA]; nucleic acid binding [goid 3676] [evidence IEA]; metal ion binding [goid 46872] [evidence IEA]; zinc ion binding [goid 8270] [evidence IEA]; DNA binding [goid 3677] [evidence ISS]
4220673	-0.263154	-3.27623	0.00417438	0.644017	-1.90143	NA	Spata13
4230681	-0.234816	-3.21518	0.00477641	0.644017	-2.00568	NA	E430034L04Rik
4290360	0.263516	3.33913	0.00363216	0.644017	-1.79383	68929	Mospd3	5	5qG2	Mus musculus motile sperm domain containing 3 (Mospd3), mRNA.	membrane [goid 16020] [evidence IEA]; integral to membrane [goid 16021] [evidence ISS]; membrane [goid 16020] [evidence IEA]; integral to membrane [goid 16021] [evidence ISS]	heart development [goid 7507] [evidence IMP]; heart development [goid 7507] [evidence IMP]	structural molecule activity [goid 5198] [evidence IEA]; protein binding [goid 5515] [evidence IPI]; structural molecule activity [goid 5198] [evidence IEA]; protein binding [goid 5515] [evidence IPI]
430059	-0.329551	-3.25962	0.00433039	0.644017	-1.92982	NA	A430041B07Rik
430348	-0.301301	-3.3153	0.00382891	0.644017	-1.83462	70681	3830405G04Rik	5	5qE4	Mus musculus coiled-coil domain containing 98 (Ccdc98), mRNA.
450133	-0.25619	-3.34646	0.00357361	0.644017	-1.78127	21810	Tgfbi	13	13qB1	Mus musculus transforming growth factor, beta induced (Tgfbi), mRNA.	extracellular matrix (sensu Metazoa) [goid 5578] [evidence IDA]; extracellular space [goid 5615] [evidence IDA]	cell adhesion [goid 7155] [evidence IDA]	protein binding [goid 5515] [evidence IEA]
450739	0.286737	3.39914	0.00317968	0.644017	-1.69103	22177	Tyrobp	7	7qB1	Mus musculus TYRO protein tyrosine kinase binding protein (Tyrobp), mRNA.	membrane [goid 16020] [evidence IEA]		kinase activity [goid 16301] [evidence IEA]; protein binding [goid 5515] [evidence IPI]
4670608	-0.271733	-3.23026	0.00462023	0.644017	-1.97995	15930	Indo	8	8qA2	Mus musculus indoleamine-pyrrole 2,3 dioxygenase (Indo), mRNA.		immune response [goid 6955] [evidence IEA]; defense response [goid 6952] [evidence TAS]; tryptophan catabolism to kynurenine [goid 19441] [evidence IDA]	oxidoreductase activity [goid 16491] [evidence IEA]; indoleamine-pyrrole 2,3-dioxygenase activity [goid 4426] [evidence IDA]; heme binding [goid 20037] [evidence IEA]; oxidoreductase activity, acting on single donors with incorporation of molecular oxygen, incorporation of two atoms of oxygen [goid 16702] [evidence IEA]; metal ion binding [goid 46872] [evidence IEA]; iron ion binding [goid 5506] …
4730450	0.323589	3.35277	0.00352406	0.644017	-1.77048	81017	V1rd1	7	7qA1	Mus musculus vomeronasal 1 receptor, D1 (V1rd1), mRNA.	integral to membrane [goid 16021] [evidence IEA]; membrane [goid 16020] [evidence IEA]	G-protein coupled receptor protein signaling pathway [goid 7186] [evidence IEA]; signal transduction [goid 7165] [evidence IEA]	pheromone receptor activity [goid 16503] [evidence IEA]; receptor activity [goid 4872] [evidence IEA]; signal transducer activity [goid 4871] [evidence IEA]; rhodopsin-like receptor activity [goid 1584] [evidence IEA]; G-protein coupled receptor activity [goid 4930] [evidence IEA]
4810564	0.246442	3.30354	0.00392985	0.644017	-1.85474	68214	Gsto2	19	19qD1	Mus musculus glutathione S-transferase omega 2 (Gsto2), mRNA.	cytoplasm [goid 5737] [evidence IEA]; cytoplasm [goid 5737] [evidence IEA]	metabolism [goid 8152] [evidence IEA]; metabolism [goid 8152] [evidence IEA]	transferase activity [goid 16740] [evidence IEA]; glutathione transferase activity [goid 4364] [evidence IEA]; transferase activity [goid 16740] [evidence IEA]; glutathione transferase activity [goid 4364] [evidence IEA]
4900403	-0.305972	-3.34993	0.00354628	0.644017	-1.77534	NA	Gnas
520255	-0.2237	-3.2226	0.00469888	0.644017	-1.99301	226352	Epb4.1l5	1	1qE2.3	Mus musculus erythrocyte protein band 4.1-like 5 (Epb4.1l5), mRNA.	cytoplasm [goid 5737] [evidence IEA]; cytoskeleton [goid 5856] [evidence IEA]; membrane [goid 16020] [evidence IEA]; cytoplasm [goid 5737] [evidence IEA]; cytoskeleton [goid 5856] [evidence IEA]; membrane [goid 16020] [evidence IEA]		cytoskeletal protein binding [goid 8092] [evidence IEA]; binding [goid 5488] [evidence IEA]; cytoskeletal protein binding [goid 8092] [evidence IEA]; binding [goid 5488] [evidence IEA]
5390470	-0.278231	-3.28616	0.00408374	0.644017	-1.88445	NA	Parn
5550753	-0.327424	-3.31374	0.00384215	0.644017	-1.83729	NA	Gnal
5810504	0.283791	3.18984	0.00505052	0.644017	-2.04887	19415	Rasal1	5	5qF	Mus musculus RAS protein activator like 1 (GAP1 like) (Rasal1), mRNA.	intracellular [goid 5622] [evidence IEA]	intracellular signaling cascade [goid 7242] [evidence IEA]; regulation of small GTPase mediated signal transduction [goid 51056] [evidence IEA]	GTPase activator activity [goid 5096] [evidence IEA]; metal ion binding [goid 46872] [evidence IEA]; zinc ion binding [goid 8270] [evidence IEA]
5890653	0.29017	3.39616	0.00320078	0.644017	-1.69614	66042	Sostdc1	12	12qA3	Mus musculus sclerostin domain containing 1 (Sostdc1), mRNA.	extracellular space [goid 5615] [evidence IDA]	odontogenesis (sensu Vertebrata) [goid 42475] [evidence IMP]; negative regulation of BMP signaling pathway [goid 30514] [evidence IGI]; Wnt receptor signaling pathway [goid 16055] [evidence IEA]; pattern specification [goid 7389] [evidence IMP]	protein binding [goid 5515] [evidence IPI]
5900379	0.239771	3.21576	0.00477033	0.644017	-2.00469	NA	C78915
5900440	0.244888	3.37428	0.00335999	0.644017	-1.73364	NA	Fgd2
6110360	-0.305949	-3.27347	0.00419992	0.644017	-1.90615	NA	Fut9
6130255	-0.253744	-3.30634	0.00390559	0.644017	-1.84995	66308	2810021B07Rik	13	13qA2	Mus musculus RIKEN cDNA 2810021B07 gene (2810021B07Rik), mRNA.
6200187	-0.371976	-3.34499	0.00358528	0.644017	-1.78379	NA	Ddx6
6290239	0.30286	3.40403	0.00314541	0.644017	-1.68266	NA	4632401N01Rik
6420564	-0.264981	-3.23291	0.00459326	0.644017	-1.97542	NA	Plag1
6480669	-0.237383	-3.37317	0.00336823	0.644017	-1.73553	NA	3732409C05Rik	7	7qF1		peroxisome [goid 5777] [evidence IDA]
6560398	-0.289797	-3.22813	0.00464202	0.644017	-1.98359	319478	Cxxc4	3	3qG3	Mus musculus CXXC finger 4 (Cxxc4), mRNA.	cytoplasmic membrane-bound vesicle [goid 16023] [evidence IDA]; cytoplasm [goid 5737] [evidence IDA]; cytoplasmic membrane-bound vesicle [goid 16023] [evidence IDA]; cytoplasm [goid 5737] [evidence IDA]	Wnt receptor signaling pathway [goid 16055] [evidence IPI]; Wnt receptor signaling pathway [goid 16055] [evidence IPI]	zinc ion binding [goid 8270] [evidence IEA]; DNA binding [goid 3677] [evidence IEA]; zinc ion binding [goid 8270] [evidence IEA]; DNA binding [goid 3677] [evidence IEA]
6760114	-0.287391	-3.18678	0.00508476	0.644017	-2.0541	NA	Tbl1x
6770333	0.261126	3.1857	0.00509679	0.644017	-2.05593	330503	EG330503	7	7qB1	Mus musculus predicted gene, EG330503 (EG330503), mRNA.
6840170	-0.284443	-3.19519	0.00499142	0.644017	-2.03976	NA	Prdm2
6940243	0.284537	3.18506	0.00510394	0.644017	-2.05701	71099	4933424F08Rik	14	14qC3	Mus musculus testis-specific serine kinase 4 (Tssk4), mRNA.		protein amino acid phosphorylation [goid 6468] [evidence ISS]; development [goid 7275] [evidence IEA]; cell differentiation [goid 30154] [evidence IEA]; spermatogenesis [goid 7283] [evidence ISS]	protein kinase activity [goid 4672] [evidence IEA]; protein serine/threonine kinase activity [goid 4674] [evidence ISS]; magnesium ion binding [goid 287] [evidence ISS]; ATP binding [goid 5524] [evidence ISS]; metal ion binding [goid 46872] [evidence IEA]; nucleotide binding [goid 166] [evidence IEA]; transferase activity [goid 16740] [evidence IEA]; kinase activity [goid 16301] [evidence IEA]
6960484	-0.260461	-3.21272	0.0048024	0.644017	-2.00988	NA	Mllt3
7050279	-0.347605	-3.21194	0.00481065	0.644017	-2.0112	NA	A230057E24Rik
7330093	0.320075	3.38666	0.00326899	0.644017	-1.71243	NA	1500005N04Rik
7400706	-0.235354	-3.41559	0.00306571	0.644017	-1.66284	22418	Wnt5a	14	14qA3	Mus musculus wingless-related MMTV integration site 5A (Wnt5a), mRNA.		lung development [goid 30324] [evidence IMP]; Wnt receptor signaling pathway [goid 16055] [evidence IEA]; cell-cell signaling [goid 7267] [evidence TAS]; embryonic development [goid 9790] [evidence IMP]; embryonic limb morphogenesis [goid 30326] [evidence IMP]; development [goid 7275] [evidence IEA]; JNK cascade [goid 7254] [evidence IDA]; signal transduction [goid 7165] [evidence TAS]; frizzled-…	receptor binding [goid 5102] [evidence TAS]; signal transducer activity [goid 4871] [evidence IEA]; protein binding [goid 5515] [evidence IPI]; receptor binding [goid 5102] [evidence TAS]; signal transducer activity [goid 4871] [evidence IEA]; protein binding [goid 5515] [evidence IPI]
7560039	0.279711	3.34368	0.00359572	0.644017	-1.78604	545938	4732475C15Rik	7	7qA3	Mus musculus zinc finger proten 607 (Zfp607), mRNA.	nucleus [goid 5634] [evidence IEA]; intracellular [goid 5622] [evidence IEA]	regulation of transcription, DNA-dependent [goid 6355] [evidence IEA]	zinc ion binding [goid 8270] [evidence IEA]; metal ion binding [goid 46872] [evidence IEA]; nucleic acid binding [goid 3676] [evidence IEA]
7610722	-0.297081	-3.3235	0.00376005	0.644017	-1.82059	NA	Brd2	17	17qB1		nucleus [goid 5634] [evidence IDA]; cytoplasm [goid 5737] [evidence IDA]
770162	-0.255463	-3.21076	0.00482319	0.644017	-2.01322	242705	E2f2	4	4qD3	Mus musculus E2F transcription factor 2 (E2f2), mRNA.	nucleus [goid 5634] [evidence IDA]; transcription factor complex [goid 5667] [evidence IEA]; nucleus [goid 5634] [evidence IDA]; transcription factor complex [goid 5667] [evidence IEA]; nucleus [goid 5634] [evidence IDA]; transcription factor complex [goid 5667] [evidence IEA]	cell cycle [goid 7049] [evidence IEA]; regulation of transcription, DNA-dependent [goid 6355] [evidence IEA]; regulation of transcription [goid 45449] [evidence IDA]; transcription [goid 6350] [evidence IEA]; apoptosis [goid 6915] [evidence IDA]; cell cycle [goid 7049] [evidence IEA]; regulation of transcription, DNA-dependent [goid 6355] [evidence IEA]; regulation of transcription [goid 45449] […	protein binding [goid 5515] [evidence IPI]; DNA binding [goid 3677] [evidence IEA]; transcription factor activity [goid 3700] [evidence IDA]; protein binding [goid 5515] [evidence IPI]; DNA binding [goid 3677] [evidence IEA]; transcription factor activity [goid 3700] [evidence IDA]; protein binding [goid 5515] [evidence IPI]; DNA binding [goid 3677] [evidence IEA]; transcription factor activity […
870521	0.258501	3.33733	0.00364667	0.644017	-1.79692	NA	Apba2bp
940520	0.267771	3.2594	0.00433245	0.644017	-1.93018	NA	B830045N13Rik	1	1qF-qG1
990669	0.371065	3.24425	0.00447978	0.644017	-1.95606	242646	4833401D15Rik	4	4qD1	Mus musculus RIKEN cDNA 4833401D15 gene (4833401D15Rik), mRNA.
1230437	-0.260642	-3.18173	0.0051415	0.64543	-2.06269	NA	A630082N15Rik
2100592	0.246533	3.17343	0.00523626	0.647365	-2.07683	NA	9630011E01Rik
4830201	-0.257887	-3.17431	0.00522609	0.647365	-2.07532	NA	Nssr
510291	-0.306368	-3.17741	0.00519068	0.647365	-2.07006	NA	Alcam
1110131	-0.35063	-3.1399	0.00563675	0.647641	-2.13389	NA	LOC242051
1300630	-0.292611	-3.13664	0.00567723	0.647641	-2.13943	NA	scl0001284.1_18
1470128	-0.272112	-3.16808	0.0052982	0.647641	-2.08593	71436	Flrt3	2	2qF3	Mus musculus fibronectin leucine rich transmembrane protein 3 (Flrt3), mRNA.	integral to membrane [goid 16021] [evidence IEA]; membrane [goid 16020] [evidence IEA]; integral to membrane [goid 16021] [evidence IEA]; membrane [goid 16020] [evidence IEA]; integral to membrane [goid 16021] [evidence IEA]; membrane [goid 16020] [evidence IEA]		transferase activity [goid 16740] [evidence IEA]; transferase activity [goid 16740] [evidence IEA]; transferase activity [goid 16740] [evidence IEA]
20646	-0.282591	-3.13504	0.00569721	0.647641	-2.14215	NA	Wdfy1
2190196	0.242474	3.1363	0.00568143	0.647641	-2.14	NA	Mt2
2470239	0.265254	3.13462	0.00570241	0.647641	-2.14286	50997	Mpp2	11	11qD	Mus musculus membrane protein, palmitoylated 2 (MAGUK p55 subfamily member 2) (Mpp2), mRNA.	membrane [goid 16020] [evidence ISS]	protein complex assembly [goid 6461] [evidence ISS]	protein binding [goid 5515] [evidence ISS]
2600176	0.249579	3.13385	0.00571213	0.647641	-2.14418	22153	Tubb4	17	17qD	Mus musculus tubulin, beta 4 (Tubb4), mRNA.	cilium [goid 5929] [evidence IDA]; microtubule [goid 5874] [evidence IEA]; protein complex [goid 43234] [evidence IEA]; cytoplasm [goid 5737] [evidence IEA]	microtubule-based process [goid 7017] [evidence IEA]; microtubule-based movement [goid 7018] [evidence IEA]; protein polymerization [goid 51258] [evidence IEA]	GTPase activity [goid 3924] [evidence IEA]; nucleotide binding [goid 166] [evidence IEA]; structural constituent of cytoskeleton [goid 5200] [evidence IEA]; GTP binding [goid 5525] [evidence IEA]; structural molecule activity [goid 5198] [evidence IEA]
2850075	-0.214018	-3.12944	0.00576763	0.647641	-2.15166	72999	Insig2	1	1qE2.3	Mus musculus insulin induced gene 2 (Insig2), mRNA.		response to sterol depletion [goid 6991] [evidence IDA]; response to sterol depletion [goid 6991] [evidence IDA]	protein binding [goid 5515] [evidence IPI]; protein binding [goid 5515] [evidence IPI]
290164	0.255162	3.14856	0.00553051	0.647641	-2.11916	NA	Prickle2
2940097	0.267763	3.16357	0.00535105	0.647641	-2.09362	NA	Psme3
4220187	0.254564	3.15737	0.00542444	0.647641	-2.10416	56613	Rps6ka4	19	19qA	Mus musculus ribosomal protein S6 kinase, polypeptide 4 (Rps6ka4), mRNA.	nucleus [goid 5634] [evidence ISS]	protein kinase cascade [goid 7243] [evidence ISS]; regulation of transcription, DNA-dependent [goid 6355] [evidence ISS]; protein amino acid phosphorylation [goid 6468] [evidence ISS]	kinase activity [goid 16301] [evidence IEA]; transferase activity [goid 16740] [evidence IEA]; nucleotide binding [goid 166] [evidence IEA]; ribosomal protein S6 kinase activity [goid 4711] [evidence ISS]; ATP binding [goid 5524] [evidence ISS]; protein serine/threonine kinase activity [goid 4674] [evidence IEA]; mitogen-activated protein kinase p38 binding [goid 48273] [evidence ISS]; protein bi…
4860661	0.319236	3.14674	0.00555271	0.647641	-2.12226	NA	LOC384891
5310037	0.23155	3.13278	0.00572554	0.647641	-2.14599	227292	Ctdsp1	1	1qC3	Mus musculus CTD (carboxy-terminal domain, RNA polymerase II, polypeptide A) small phosphatase 1 (Ctdsp1), mRNA.	nucleus [goid 5634] [evidence IEA]; nucleus [goid 5634] [evidence IEA]; nucleus [goid 5634] [evidence IEA]		hydrolase activity [goid 16787] [evidence IEA]; phosphoprotein phosphatase activity [goid 4721] [evidence IEA]; phosphoric monoester hydrolase activity [goid 16791] [evidence IEA]; hydrolase activity [goid 16787] [evidence IEA]; phosphoprotein phosphatase activity [goid 4721] [evidence IEA]; phosphoric monoester hydrolase activity [goid 16791] [evidence IEA]; hydrolase activity [goid 16787] [evid…
540047	-0.313854	-3.14029	0.0056319	0.647641	-2.13323	NA	Cdh8
5420315	-0.285836	-3.153	0.00547686	0.647641	-2.11161	NA	Cnot4
60332	0.249629	3.16794	0.00529985	0.647641	-2.08617	NA	Shd
6550687	0.226131	3.15624	0.00543801	0.647641	-2.1061	50934	Slc7a8	14	14qC3	Mus musculus solute carrier family 7 (cationic amino acid transporter, y+ system), member 8 (Slc7a8), mRNA.	plasma membrane [goid 5886] [evidence ISS]; membrane [goid 16020] [evidence IEA]; plasma membrane [goid 5886] [evidence ISS]; membrane [goid 16020] [evidence IEA]	transport [goid 6810] [evidence IEA]; amino acid transport [goid 6865] [evidence ISS]; transport [goid 6810] [evidence IEA]; amino acid transport [goid 6865] [evidence ISS]	amino acid transporter activity [goid 15171] [evidence IEA]; amino acid permease activity [goid 15359] [evidence IEA]; amino acid-polyamine transporter activity [goid 5279] [evidence ISS]; amino acid transporter activity [goid 15171] [evidence IEA]; amino acid permease activity [goid 15359] [evidence IEA]; amino acid-polyamine transporter activity [goid 5279] [evidence ISS]
6560255	0.223909	3.13034	0.0057563	0.647641	-2.15014	99237	Tm9sf4	2	2qH1	Mus musculus transmembrane 9 superfamily protein member 4 (Tm9sf4), mRNA.
6860528	0.230193	3.16344	0.00535254	0.647641	-2.09383	13821	Epb4.1l1	2	2qH1	Mus musculus erythrocyte protein band 4.1-like 1 (Epb4.1l1), transcript variant 3, mRNA.	membrane [goid 16020] [evidence IEA]; cytoskeleton [goid 5856] [evidence IEA]; cytoplasm [goid 5737] [evidence IEA]	cortical actin cytoskeleton organization and biogenesis [goid 30866] [evidence IEA]	binding [goid 5488] [evidence IEA]; structural molecule activity [goid 5198] [evidence IEA]; actin binding [goid 3779] [evidence IEA]; protein binding [goid 5515] [evidence IPI]; cytoskeletal protein binding [goid 8092] [evidence IEA]
6900193	-0.256282	-3.15259	0.0054817	0.647641	-2.11229	NA	Mrg1
2030274	-0.216668	-3.12497	0.00582447	0.651038	-2.15926	21406	Tcf12	9	9qD	Mus musculus transcription factor 12 (Tcf12), mRNA.	nucleus [goid 5634] [evidence IEA]; transcription factor complex [goid 5667] [evidence IDA]; nucleus [goid 5634] [evidence IEA]; transcription factor complex [goid 5667] [evidence IDA]; nucleus [goid 5634] [evidence IEA]; transcription factor complex [goid 5667] [evidence IDA]	development [goid 7275] [evidence IEA]; regulation of transcription, DNA-dependent [goid 6355] [evidence IEA]; regulation of transcription [goid 45449] [evidence IEA]; regulation of transcription from RNA polymerase II promoter [goid 6357] [evidence IDA]; transcription [goid 6350] [evidence IEA]; development [goid 7275] [evidence IEA]; regulation of transcription, DNA-dependent [goid 6355] [evide…	protein binding [goid 5515] [evidence IPI]; transcription regulator activity [goid 30528] [evidence IEA]; DNA binding [goid 3677] [evidence IDA]; transcriptional activator activity [goid 16563] [evidence IDA]; protein binding [goid 5515] [evidence IPI]; transcription regulator activity [goid 30528] [evidence IEA]; DNA binding [goid 3677] [evidence IDA]; transcriptional activator activity [goid 16…
3120328	-0.237249	-3.12178	0.0058654	0.652633	-2.16468	NA	Gm592
1170402	-0.271825	-3.11538	0.00594836	0.655901	-2.17556	NA	B130065G19Rik
4670551	-0.231839	-3.11541	0.00594798	0.655901	-2.17551	NA	C030005I21Rik
1400152	-0.295471	-3.11152	0.00599886	0.65637	-2.1821	13641	Efnb1	X	XqC3	Mus musculus ephrin B1 (Efnb1), mRNA.	membrane [goid 16020] [evidence IEA]; lipid raft [goid 45121] [evidence IDA]	neural crest cell migration [goid 1755] [evidence IMP]; axon guidance [goid 7411] [evidence IMP]; development [goid 7275] [evidence IEA]; embryonic pattern specification [goid 9880] [evidence IMP]; cell differentiation [goid 30154] [evidence IEA]; positive regulation of T cell proliferation [goid 42102] [evidence IDA]	protein binding [goid 5515] [evidence IPI]; ephrin receptor binding [goid 46875] [evidence IPI]
2340039	-0.242101	-3.10893	0.00603306	0.65637	-2.18651	NA	C86987
3180424	0.23097	3.10954	0.00602501	0.65637	-2.18547	72749	2810439M11Rik	15	15qD3	Mus musculus nuclear factor of kappa light polypeptide gene enhancer in B-cells inhibitor-like 2 (Nfkbil2), mRNA.			binding [goid 5488] [evidence IEA]; transferase activity [goid 16740] [evidence IEA]
2450100	0.236155	3.0977	0.0061833	0.667589	-2.20556	NA	Punc
4220494	0.294099	3.09716	0.00619072	0.667589	-2.20648	240332	Slc6a7	18	18qE1	Mus musculus solute carrier family 6 (neurotransmitter transporter, L-proline), member 7 (Slc6a7), mRNA.	integral to membrane [goid 16021] [evidence IEA]; integral to plasma membrane [goid 5887] [evidence IEA]; membrane [goid 16020] [evidence IEA]	transport [goid 6810] [evidence IEA]; amino acid transport [goid 6865] [evidence IEA]; neurotransmitter transport [goid 6836] [evidence IEA]	symporter activity [goid 15293] [evidence IEA]; amino acid transporter activity [goid 15171] [evidence IEA]; neurotransmitter:sodium symporter activity [goid 5328] [evidence IEA]
1260484	0.244907	3.08417	0.00636928	0.67208	-2.2285	NA	Sema6a
2030240	-0.279564	-3.08705	0.00632927	0.67208	-2.22362	NA	Ccnc
4010465	0.272936	3.08378	0.0063748	0.67208	-2.22918	NA	Kcnc4
5670280	0.237865	3.08895	0.00630302	0.67208	-2.22041	22691	Zscan2	7	7qD3	Mus musculus zinc finger and SCAN domain containing 2 (Zscan2), mRNA.	nucleus [goid 5634] [evidence IEA]; intracellular [goid 5622] [evidence IEA]; nucleus [goid 5634] [evidence IEA]; intracellular [goid 5622] [evidence IEA]; nucleus [goid 5634] [evidence IEA]; intracellular [goid 5622] [evidence IEA]	transcription [goid 6350] [evidence IEA]; spermatogenesis [goid 7283] [evidence IEA]; cell differentiation [goid 30154] [evidence IEA]; regulation of transcription, DNA-dependent [goid 6355] [evidence IEA]; development [goid 7275] [evidence IEA]; transcription [goid 6350] [evidence IEA]; spermatogenesis [goid 7283] [evidence IEA]; cell differentiation [goid 30154] [evidence IEA]; regulation of tr…	transcription factor activity [goid 3700] [evidence IEA]; DNA binding [goid 3677] [evidence IEA]; zinc ion binding [goid 8270] [evidence IEA]; metal ion binding [goid 46872] [evidence IEA]; nucleic acid binding [goid 3676] [evidence IEA]; transcription factor activity [goid 3700] [evidence IEA]; DNA binding [goid 3677] [evidence IEA]; zinc ion binding [goid 8270] [evidence IEA]; metal ion binding…
6840743	0.32748	3.09059	0.00628038	0.67208	-2.21762	NA	Ap2a1
6900114	0.271224	3.08218	0.00639711	0.67208	-2.23188	NA	Crhr1
1070528	0.285331	3.01126	0.00746906	0.67388	-2.35186	NA	Sema3b
1410747	0.21103	3.05183	0.00683627	0.67388	-2.2833	NA	1810013C15Rik
1440296	0.243996	3.03282	0.007126	0.67388	-2.31545	268480	Rapgefl1	11	11qD	Mus musculus Rap guanine nucleotide exchange factor (GEF)-like 1 (Rapgefl1), mRNA.	intracellular [goid 5622] [evidence IEA]	small GTPase mediated signal transduction [goid 7264] [evidence IEA]; signal transduction [goid 7165] [evidence IEA]	guanyl-nucleotide exchange factor activity [goid 5085] [evidence IEA]
160100	0.312825	3.04568	0.0069287	0.67388	-2.2937	NA	Igfbp5
1780053	0.300716	3.00806	0.00752148	0.67388	-2.35727	NA	AI839735
1850039	-0.265747	-3.04898	0.00687885	0.67388	-2.28811	20148	Dhrs3	4	4qE1	Mus musculus dehydrogenase/reductase (SDR family) member 3 (Dhrs3), mRNA.	integral to membrane [goid 16021] [evidence IEA]; membrane [goid 16020] [evidence IEA]		oxidoreductase activity [goid 16491] [evidence IEA]
1990487	-0.360542	-3.03809	0.00704448	0.67388	-2.30654	NA	Bach1
2000048	0.222174	3.05319	0.00681585	0.67388	-2.28098	84585	Rnf123	9	9qF2	Mus musculus ring finger protein 123 (Rnf123), mRNA.			zinc ion binding [goid 8270] [evidence IEA]; metal ion binding [goid 46872] [evidence IEA]; molecular_function [goid 3674] [evidence ND ]; ligase activity [goid 16874] [evidence IEA]; protein binding [goid 5515] [evidence IEA]
2140292	-0.216007	-3.02721	0.00721381	0.67388	-2.32493	NA	Ppp1r1c
2350452	-0.225011	-3.07155	0.00654765	0.67388	-2.24989	NA	Disp1
2370504	-0.251374	-3.04194	0.00698547	0.67388	-2.30002	58182	Gpr73	6	6qD1	Mus musculus prokineticin receptor 1 (Prokr1), mRNA.	membrane [goid 16020] [evidence IEA]; membrane [goid 16020] [evidence IEA]	G-protein coupled receptor protein signaling pathway [goid 7186] [evidence TAS]; circadian rhythm [goid 7623] [evidence TAS]; signal transduction [goid 7165] [evidence IEA]; G-protein coupled receptor protein signaling pathway [goid 7186] [evidence TAS]; circadian rhythm [goid 7623] [evidence TAS]; signal transduction [goid 7165] [evidence IEA]	receptor activity [goid 4872] [evidence IEA]; signal transducer activity [goid 4871] [evidence IEA]; G-protein coupled receptor activity [goid 4930] [evidence TAS]; receptor activity [goid 4872] [evidence IEA]; signal transducer activity [goid 4871] [evidence IEA]; G-protein coupled receptor activity [goid 4930] [evidence TAS]
2510575	-0.278482	-3.00352	0.00759615	0.67388	-2.36492	101148	B630005N14Rik	6	6qA1	Mus musculus RIKEN cDNA B630005N14 gene (B630005N14Rik), mRNA.
270494	-0.254107	-3.06393	0.00665773	0.67388	-2.2628	NA	1110037F02Rik
290369	0.355486	3.01755	0.00736736	0.67388	-2.34124	NA	Kifc2
2940224	0.258103	3.03195	0.0071396	0.67388	-2.31692	NA	Zfp316
3420431	-0.220656	-3.00674	0.00754304	0.67388	-2.35949	NA	D430043M02Rik
3450333	-0.222071	-3.03465	0.00709766	0.67388	-2.31236	NA	Mapk8ip3
3800128	0.309152	3.0113	0.00746854	0.67388	-2.3518	NA	Dlx6as
3930093	-0.338763	-3.02122	0.00730863	0.67388	-2.33504	NA	LOC232532
4070091	-0.290765	-3.02019	0.00732514	0.67388	-2.33679	434459	LOC434459	14	14qC2	Mus musculus predicted gene, EG434459 (EG434459), mRNA.
4180575	0.216559	3.04996	0.00686413	0.67388	-2.28645	67905	Ppm1m	9	9qF1	Mus musculus protein phosphatase 1M (Ppm1m), transcript variant 1, mRNA.	protein serine/threonine phosphatase complex [goid 8287] [evidence IEA]; nucleus [goid 5634] [evidence IDA]; protein serine/threonine phosphatase complex [goid 8287] [evidence IEA]; nucleus [goid 5634] [evidence IDA]	protein amino acid dephosphorylation [goid 6470] [evidence IDA]; protein amino acid dephosphorylation [goid 6470] [evidence IDA]	catalytic activity [goid 3824] [evidence IEA]; phosphoprotein phosphatase activity [goid 4721] [evidence IDA]; magnesium ion binding [goid 287] [evidence IEA]; metal ion binding [goid 46872] [evidence IEA]; protein serine/threonine phosphatase activity [goid 4722] [evidence IEA]; manganese ion binding [goid 30145] [evidence IEA]; CTD phosphatase activity [goid 8420] [evidence IDA]; hydrolase acti…
4220753	0.230421	3.02049	0.00732029	0.67388	-2.33628	14678	Gnai2		9qF1	Mus musculus guanine nucleotide binding protein, alpha inhibiting 2 (Gnai2), mRNA.		signal transduction [goid 7165] [evidence IEA]; G-protein coupled receptor protein signaling pathway [goid 7186] [evidence TAS]; G-protein signaling, adenylate cyclase inhibiting pathway [goid 7193] [evidence ISS]; cell proliferation [goid 8283] [evidence IPI]; acetylcholine receptor signaling, muscarinic pathway [goid 7213] [evidence IMP]	guanyl nucleotide binding [goid 19001] [evidence IEA]; protein binding [goid 5515] [evidence IPI]; GTP binding [goid 5525] [evidence ISS]; signal transducer activity [goid 4871] [evidence IEA]; nucleotide binding [goid 166] [evidence IEA]; GTPase activity [goid 3924] [evidence TAS]
430243	-0.362194	-3.03761	0.00705185	0.67388	-2.30734	NA	Csnk2a1-rs3
4670491	-0.291676	-3.0502	0.00686066	0.67388	-2.28606	NA	Metapl1
4730458	-0.245237	-3.02463	0.00725445	0.67388	-2.32928	NA	Adamts19
4830411	0.212014	3.00341	0.00759798	0.67388	-2.36511	NA	D630041K24Rik
5260092	0.220564	3.04195	0.00698539	0.67388	-2.30001	14788	Gpr162	6	6qF2	Mus musculus G protein-coupled receptor 162 (Gpr162), mRNA.	integral to membrane [goid 16021] [evidence IEA]; membrane [goid 16020] [evidence IEA]	G-protein coupled receptor protein signaling pathway [goid 7186] [evidence IEA]; signal transduction [goid 7165] [evidence IEA]	receptor activity [goid 4872] [evidence IEA]; signal transducer activity [goid 4871] [evidence IEA]; rhodopsin-like receptor activity [goid 1584] [evidence IEA]; G-protein coupled receptor activity [goid 4930] [evidence IEA]
5420747	0.215457	3.04578	0.00692713	0.67388	-2.29352	108075	Ltbp4	7	7qA3	Mus musculus latent transforming growth factor beta binding protein 4 (Ltbp4), mRNA.	extracellular matrix (sensu Metazoa) [goid 5578] [evidence ISS]; extracellular matrix (sensu Metazoa) [goid 5578] [evidence ISS]; extracellular matrix (sensu Metazoa) [goid 5578] [evidence ISS]	growth hormone secretion [goid 30252] [evidence ISS]; development [goid 7275] [evidence ISS]; protein folding [goid 6457] [evidence ISS]; regulation of cell growth [goid 1558] [evidence ISS]; regulation of cell differentiation [goid 45595] [evidence ISS]; regulation of transforming growth factor beta receptor signaling pathway [goid 17015] [evidence ISS]; regulation of proteolysis [goid 30162] [e…	integrin binding [goid 5178] [evidence ISS]; glycosaminoglycan binding [goid 5539] [evidence ISS]; growth factor binding [goid 19838] [evidence IEA]; calcium ion binding [goid 5509] [evidence ISS]; protein binding [goid 5515] [evidence TAS]; integrin binding [goid 5178] [evidence ISS]; glycosaminoglycan binding [goid 5539] [evidence ISS]; growth factor binding [goid 19838] [evidence IEA]; calcium…
5550187	-0.252607	-3.02647	0.00722541	0.67388	-2.32617	76051	Ganc	2	2qE5	Mus musculus glucosidase, alpha; neutral C (Ganc), mRNA.		metabolism [goid 8152] [evidence IEA]; glucose metabolism [goid 6006] [evidence IC ]; metabolism [goid 8152] [evidence IEA]; glucose metabolism [goid 6006] [evidence IC ]	hydrolase activity [goid 16787] [evidence IEA]; alpha-glucosidase activity [goid 4558] [evidence IDA]; hydrolase activity, acting on glycosyl bonds [goid 16798] [evidence IEA]; hydrolase activity [goid 16787] [evidence IEA]; alpha-glucosidase activity [goid 4558] [evidence IDA]; hydrolase activity, acting on glycosyl bonds [goid 16798] [evidence IEA]
5810253	0.244573	3.04358	0.00696059	0.67388	-2.29726	26456	Sema4g	19	19qC3	Mus musculus sema domain, immunoglobulin domain (Ig), transmembrane domain (TM) and short cytoplasmic domain, (semaphorin) 4G (Sema4g), mRNA.	membrane [goid 16020] [evidence IEA]	cell differentiation [goid 30154] [evidence IEA]; development [goid 7275] [evidence IEA]	receptor activity [goid 4872] [evidence IEA]
5910333	-0.418829	-3.0764	0.00647855	0.67388	-2.24168	229357	Gpr149	3	3qE1	Mus musculus G protein-coupled receptor 149 (Gpr149), mRNA.	membrane [goid 16020] [evidence IEA]; integral to membrane [goid 16021] [evidence IEA]	G-protein coupled receptor protein signaling pathway [goid 7186] [evidence IEA]; signal transduction [goid 7165] [evidence IEA]	G-protein coupled receptor activity [goid 4930] [evidence IEA]; rhodopsin-like receptor activity [goid 1584] [evidence IEA]; signal transducer activity [goid 4871] [evidence IEA]; receptor activity [goid 4872] [evidence IEA]
6280564	0.262564	3.00426	0.00758402	0.67388	-2.36369	269615	Plch2	4	4qE2	Mus musculus phospholipase C, eta 2 (Plch2), mRNA.	plasma membrane [goid 5886] [evidence IDA]	lipid metabolism [goid 6629] [evidence IEA]; phosphoinositide metabolism [goid 30384] [evidence IDA]	phospholipase C activity [goid 4629] [evidence IDA]; signal transducer activity [goid 4871] [evidence IEA]; phosphoinositide phospholipase C activity [goid 4435] [evidence IEA]
6290554	0.243362	3.05431	0.00679925	0.67388	-2.27909	NA	Tor2a
6510112	-0.262357	-3.01944	0.00733711	0.67388	-2.33805	NA	Ybx3
6550164	-0.225818	-3.02491	0.00725011	0.67388	-2.32882	242705	E2f2	4	4qD3	Mus musculus E2F transcription factor 2 (E2f2), mRNA.	nucleus [goid 5634] [evidence IDA]; transcription factor complex [goid 5667] [evidence IEA]; nucleus [goid 5634] [evidence IDA]; transcription factor complex [goid 5667] [evidence IEA]; nucleus [goid 5634] [evidence IDA]; transcription factor complex [goid 5667] [evidence IEA]	cell cycle [goid 7049] [evidence IEA]; regulation of transcription, DNA-dependent [goid 6355] [evidence IEA]; regulation of transcription [goid 45449] [evidence IDA]; transcription [goid 6350] [evidence IEA]; apoptosis [goid 6915] [evidence IDA]; cell cycle [goid 7049] [evidence IEA]; regulation of transcription, DNA-dependent [goid 6355] [evidence IEA]; regulation of transcription [goid 45449] […	protein binding [goid 5515] [evidence IPI]; DNA binding [goid 3677] [evidence IEA]; transcription factor activity [goid 3700] [evidence IDA]; protein binding [goid 5515] [evidence IPI]; DNA binding [goid 3677] [evidence IEA]; transcription factor activity [goid 3700] [evidence IDA]; protein binding [goid 5515] [evidence IPI]; DNA binding [goid 3677] [evidence IEA]; transcription factor activity […
6770427	-0.214294	-3.0234	0.00727402	0.67388	-2.33137	NA	LOC381480
6840239	0.24437	3.02174	0.00730046	0.67388	-2.33418	170939	AY026312	16	16qC3.3	Mus musculus cDNA sequence AY026312 (AY026312), mRNA.
6860603	-0.308617	-3.04145	0.00699305	0.67388	-2.30086	NA	9230115A19Rik
7000056	0.224096	3.02681	0.00722008	0.67388	-2.3256	NA	Spna2
7000446	-0.287687	-3.01231	0.00745213	0.67388	-2.3501	22778	Ikzf1	11	11qA1	Mus musculus IKAROS family zinc finger 1 (Ikzf1), transcript variant 1, mRNA.	transcription factor complex [goid 5667] [evidence TAS]; nucleus [goid 5634] [evidence IDA]; centric heterochromatin [goid 5721] [evidence IDA]; intracellular [goid 5622] [evidence IEA]; transcription factor complex [goid 5667] [evidence TAS]; nucleus [goid 5634] [evidence IDA]; centric heterochromatin [goid 5721] [evidence IDA]; intracellular [goid 5622] [evidence IEA]	regulation of transcription, DNA-dependent [goid 6355] [evidence IMP]; hemopoiesis [goid 30097] [evidence IMP]; negative regulation of transcription [goid 16481] [evidence IDA]; positive regulation of transcription from RNA polymerase II promoter [goid 45944] [evidence IDA]; positive regulation of body size [goid 40018] [evidence IMP]; transcription [goid 6350] [evidence IEA]; forebrain developme…	transcription factor activity [goid 3700] [evidence IDA]; DNA binding [goid 3677] [evidence IDA]; protein binding [goid 5515] [evidence IPI]; transcriptional repressor activity [goid 16564] [evidence IDA]; zinc ion binding [goid 8270] [evidence IEA]; metal ion binding [goid 46872] [evidence IEA]; nucleic acid binding [goid 3676] [evidence IEA]; transcription factor activity [goid 3700] [evidence …
7050538	0.284942	3.01398	0.00742493	0.67388	-2.34727	NA	Ccl9
7160133	-0.255465	-3.01731	0.00737119	0.67388	-2.34164	NA	Gas2l3
830463	-0.249699	-3.07662	0.00647551	0.67388	-2.24131	NA	C530050O22Rik
1690706	0.224638	2.99795	0.00768891	0.679484	-2.37432	110147	Bat8	17	17qB1	Mus musculus euchromatic histone lysine N-methyltransferase 2 (Ehmt2), transcript variant short, mRNA.	nucleus [goid 5634] [evidence IDA]; nucleus [goid 5634] [evidence IDA]	chromatin modification [goid 16568] [evidence IEA]; chromatin modification [goid 16568] [evidence IEA]	zinc ion binding [goid 8270] [evidence IEA]; transferase activity [goid 16740] [evidence IEA]; methyltransferase activity [goid 8168] [evidence IEA]; histone-lysine N-methyltransferase activity [goid 18024] [evidence IEA]; zinc ion binding [goid 8270] [evidence IEA]; transferase activity [goid 16740] [evidence IEA]; methyltransferase activity [goid 8168] [evidence IEA]; histone-lysine N-methyltra…
6840491	-0.289621	-2.99623	0.00771774	0.679577	-2.37722	NA	Usp48
1400605	-0.2582	-2.99264	0.00777837	0.680024	-2.38328	230484	Usp1	4	4qC6	Mus musculus ubiquitin specific peptdiase 1 (Usp1), mRNA.		ubiquitin-dependent protein catabolism [goid 6511] [evidence IEA]; ubiquitin-dependent protein catabolism [goid 6511] [evidence IEA]; ubiquitin-dependent protein catabolism [goid 6511] [evidence IEA]; ubiquitin-dependent protein catabolism [goid 6511] [evidence IEA]	cysteine-type endopeptidase activity [goid 4197] [evidence IEA]; ubiquitin thiolesterase activity [goid 4221] [evidence IEA]; peptidase activity [goid 8233] [evidence IEA]; cysteine-type endopeptidase activity [goid 4197] [evidence IEA]; ubiquitin thiolesterase activity [goid 4221] [evidence IEA]; peptidase activity [goid 8233] [evidence IEA]; cysteine-type endopeptidase activity [goid 4197] [evi…
5310274	0.244017	2.99337	0.00776603	0.680024	-2.38205	NA	Cgef2-pending
1070390	-0.248557	-2.97976	0.00799955	0.682244	-2.40499	NA	E230021B08Rik
1090040	0.223545	2.97365	0.00810647	0.682244	-2.41527	NA	E030034J16Rik
1740379	-0.21754	-2.97239	0.00812878	0.682244	-2.4174	18824	Plp2	X	XqA1.1	Mus musculus proteolipid protein 2 (Plp2), mRNA.	membrane [goid 16020] [evidence IEA]; plasma membrane [goid 5886] [evidence ISS]; membrane [goid 16020] [evidence IEA]; plasma membrane [goid 5886] [evidence ISS]	cytokine and chemokine mediated signaling pathway [goid 19221] [evidence ISS]; chemotaxis [goid 6935] [evidence ISS]; cytokine and chemokine mediated signaling pathway [goid 19221] [evidence ISS]; chemotaxis [goid 6935] [evidence ISS]	chemokine binding [goid 19956] [evidence ISS]; chemokine binding [goid 19956] [evidence ISS]
1940343	0.397321	2.97463	0.00808916	0.682244	-2.41362	NA	Vapb
2450707	-0.369581	-2.98808	0.00785597	0.682244	-2.39097	NA	4930562C03Rik
2850594	-0.25026	-2.97583	0.00806821	0.682244	-2.41161	229906	Gtf2b	3	3qH1	Mus musculus general transcription factor IIB (Gtf2b), mRNA.	transcription factor complex [goid 5667] [evidence IEA]; nucleus [goid 5634] [evidence IEA]	transcription initiation [goid 6352] [evidence IEA]; transcription [goid 6350] [evidence IEA]; regulation of transcription [goid 45449] [evidence IEA]; regulation of transcription, DNA-dependent [goid 6355] [evidence IEA]	RNA polymerase II transcription factor activity [goid 3702] [evidence IEA]; zinc ion binding [goid 8270] [evidence IEA]; metal ion binding [goid 46872] [evidence IEA]; transcription regulator activity [goid 30528] [evidence IEA]; protein binding [goid 5515] [evidence IPI]
5360451	0.299809	2.97093	0.00815457	0.682244	-2.41985	NA	3110045G13Rik	3	3qF1
5570187	0.24991	2.98468	0.00791426	0.682244	-2.39669	NA	C230096C10Rik	4	4qD3		membrane [goid 16020] [evidence IEA]; integral to membrane [goid 16021] [evidence IEA]
5570487	0.242901	2.97028	0.00816608	0.682244	-2.42095	103466	C630002B14Rik	10	10qC1	Mus musculus 5'-nucleotidase domain containing 3 (Nt5dc3), mRNA.
6040072	-0.235522	-2.97322	0.00811406	0.682244	-2.416	NA	E430021P16Rik
6350632	-0.273917	-2.98309	0.00794173	0.682244	-2.39937	73296	Rhobtb3	13	13qC1	Mus musculus Rho-related BTB domain containing 3 (Rhobtb3), mRNA.			protein binding [goid 5515] [evidence IEA]
7160091	-0.235522	-2.97916	0.00800984	0.682244	-2.40599	NA	B930060K05Rik
7510500	0.242253	2.97116	0.00815047	0.682244	-2.41946	18760	Prkcm	12	12qB3	Mus musculus protein kinase C, mu (Prkcm), mRNA.		intracellular signaling cascade [goid 7242] [evidence IEA]; protein amino acid phosphorylation [goid 6468] [evidence IEA]; intracellular signaling cascade [goid 7242] [evidence IEA]; protein amino acid phosphorylation [goid 6468] [evidence IEA]; intracellular signaling cascade [goid 7242] [evidence IEA]; protein amino acid phosphorylation [goid 6468] [evidence IEA]	protein serine/threonine kinase activity [goid 4674] [evidence IEA]; ATP binding [goid 5524] [evidence IEA]; metal ion binding [goid 46872] [evidence IEA]; zinc ion binding [goid 8270] [evidence IEA]; nucleotide binding [goid 166] [evidence IEA]; transferase activity [goid 16740] [evidence IEA]; kinase activity [goid 16301] [evidence IEA]; protein kinase activity [goid 4672] [evidence IEA]; diacy…
3460070	-0.246693	-2.96487	0.00826277	0.683939	-2.43006	71340	Riok1	13	13qA3.3	Mus musculus RIO kinase 1 (yeast) (Riok1), mRNA.			kinase activity [goid 16301] [evidence IEA]; ATP binding [goid 5524] [evidence IEA]; protein serine/threonine kinase activity [goid 4674] [evidence IEA]; kinase activity [goid 16301] [evidence IEA]; ATP binding [goid 5524] [evidence IEA]; protein serine/threonine kinase activity [goid 4674] [evidence IEA]; kinase activity [goid 16301] [evidence IEA]; ATP binding [goid 5524] [evidence IEA]; protei…
510484	0.282544	2.96445	0.00827019	0.683939	-2.43075	NA	Krt1-12	11	11qD		intermediate filament [goid 5882] [evidence IEA]	cytoskeleton organization and biogenesis [goid 7010] [evidence IEA]	structural molecule activity [goid 5198] [evidence IEA]; structural constituent of cytoskeleton [goid 5200] [evidence IEA]
6580682	-0.292836	-2.96728	0.0082195	0.683939	-2.42599	NA	Foxo1
1340408	-0.359269	-2.95547	0.00843312	0.691605	-2.44586	NA	Twistnb
2940719	-0.249341	-2.95655	0.00841333	0.691605	-2.44404	NA	D430050F21Rik
4610730	0.22887	2.95374	0.00846483	0.691605	-2.44877	NA	scl000637.1_470
540561	-0.30305	-2.94896	0.00855318	0.691605	-2.4568	NA	Mark3
5420440	-0.267631	-2.94895	0.00855347	0.691605	-2.45683	70497	Arhgap17	7	7qF3	Mus musculus Rho GTPase activating protein 17 (Arhgap17), mRNA.	insoluble fraction [goid 5626] [evidence ISS]; cytoplasm [goid 5737] [evidence ISS]; intracellular [goid 5622] [evidence IEA]; insoluble fraction [goid 5626] [evidence ISS]; cytoplasm [goid 5737] [evidence ISS]; intracellular [goid 5622] [evidence IEA]; insoluble fraction [goid 5626] [evidence ISS]; cytoplasm [goid 5737] [evidence ISS]; intracellular [goid 5622] [evidence IEA]	calcium ion-dependent exocytosis [goid 17156] [evidence ISS]; actin filament organization [goid 7015] [evidence ISS]; signal transduction [goid 7165] [evidence IEA]; calcium ion-dependent exocytosis [goid 17156] [evidence ISS]; actin filament organization [goid 7015] [evidence ISS]; signal transduction [goid 7165] [evidence IEA]; calcium ion-dependent exocytosis [goid 17156] [evidence ISS]; actin…	protein binding [goid 5515] [evidence IEA]; protein binding [goid 5515] [evidence IEA]; protein binding [goid 5515] [evidence IEA]
5910181	-0.246628	-2.95183	0.00850015	0.691605	-2.45199	67398	Srpr	9	9qA4	Mus musculus signal recognition particle receptor ('docking protein') (Srpr), mRNA.	integral to membrane [goid 16021] [evidence IEA]; signal recognition particle receptor complex [goid 5785] [evidence IEA]; ribonucleoprotein complex [goid 30529] [evidence IEA]; membrane [goid 16020] [evidence IEA]; endoplasmic reticulum [goid 5783] [evidence IEA]; integral to membrane [goid 16021] [evidence IEA]; signal recognition particle receptor complex [goid 5785] [evidence IEA]; ribonucleo…	intracellular protein transport [goid 6886] [evidence IEA]; intracellular protein transport [goid 6886] [evidence IEA]	RNA binding [goid 3723] [evidence IEA]; GTPase activity [goid 3924] [evidence IEA]; nucleoside-triphosphatase activity [goid 17111] [evidence IEA]; receptor activity [goid 4872] [evidence IEA]; signal recognition particle binding [goid 5047] [evidence IEA]; RNA binding [goid 3723] [evidence IEA]; GTPase activity [goid 3924] [evidence IEA]; nucleoside-triphosphatase activity [goid 17111] [evidence…
6960372	0.232327	2.94856	0.00856065	0.691605	-2.45748	245049	Myrip	9	9qF4	Mus musculus myosin VIIA and Rab interacting protein (Myrip), mRNA.	actin cytoskeleton [goid 15629] [evidence IDA]; synapse [goid 45202] [evidence IDA]	vesicle transport along actin filament [goid 30050] [evidence TAS]; intracellular protein transport [goid 6886] [evidence IEA]	protein binding [goid 5515] [evidence IPI]; actin binding [goid 3779] [evidence IDA]; metal ion binding [goid 46872] [evidence IEA]; zinc ion binding [goid 8270] [evidence IEA]; myosin binding [goid 17022] [evidence ISS]; Rab GTPase binding [goid 17137] [evidence ISS]
5560747	-0.238869	-2.944	0.00864578	0.693902	-2.46514	NA	9430072I10Rik
70546	-0.262036	-2.9444	0.00863831	0.693902	-2.46447	NA	Hist1h2ag	13	13qA3.1		chromosome [goid 5694] [evidence IEA]; nucleus [goid 5634] [evidence IEA]; nucleosome [goid 786] [evidence IEA]	chromosome organization and biogenesis (sensu Eukaryota) [goid 7001] [evidence IEA]; nucleosome assembly [goid 6334] [evidence IEA]	molecular_function [goid 3674] [evidence ND ]; DNA binding [goid 3677] [evidence IEA]
2470356	0.285255	2.93898	0.00874041	0.695664	-2.47357	NA	Cox6a2
2970435	-0.22727	-2.93843	0.00875094	0.695664	-2.4745	NA	9430046I01Rik
5080356	-0.262715	-2.93683	0.00878141	0.695664	-2.47719	NA	Tcf12
5550296	0.234658	2.93696	0.00877877	0.695664	-2.47696	78339	Ttyh3	5	5qG2	Mus musculus tweety homolog 3 (Drosophila) (Ttyh3), mRNA.	integral to membrane [goid 16021] [evidence ISS]		chloride channel activity [goid 5254] [evidence ISS]
1300497	0.24727	2.92973	0.00891751	0.697466	-2.4891	NA	Dact1
2120546	-0.323391	-2.92676	0.00897512	0.697466	-2.49408	142682	Zcchc14	8	8qE1	Mus musculus zinc finger, CCHC domain containing 14 (Zcchc14), mRNA.			zinc ion binding [goid 8270] [evidence IEA]; metal ion binding [goid 46872] [evidence IEA]; zinc ion binding [goid 8270] [evidence IEA]; metal ion binding [goid 46872] [evidence IEA]; zinc ion binding [goid 8270] [evidence IEA]; metal ion binding [goid 46872] [evidence IEA]
510093	-0.211666	-2.93321	0.00885049	0.697466	-2.48326	NA	Sfxn4
6660553	-0.229771	-2.9281	0.00894921	0.697466	-2.49184	67958	2610101N10Rik	9	9qE3.3	Mus musculus RIKEN cDNA 2610101N10 gene (2610101N10Rik), mRNA.		RNA processing [goid 6396] [evidence IEA]; RNA processing [goid 6396] [evidence IEA]	RNA binding [goid 3723] [evidence IEA]; nucleic acid binding [goid 3676] [evidence IEA]; nucleotide binding [goid 166] [evidence IEA]; RNA binding [goid 3723] [evidence IEA]; nucleic acid binding [goid 3676] [evidence IEA]; nucleotide binding [goid 166] [evidence IEA]
6760400	0.280565	2.92762	0.00895837	0.697466	-2.49264	NA	LOC386068
6940044	0.239418	2.92988	0.00891473	0.697466	-2.48886	13592	Ebf2	14	14qD1	Mus musculus early B-cell factor 2 (Ebf2), mRNA.	nucleus [goid 5634] [evidence IEA]; nucleus [goid 5634] [evidence IEA]	development [goid 7275] [evidence IEA]; regulation of transcription, DNA-dependent [goid 6355] [evidence IEA]; positive regulation of transcription [goid 45941] [evidence IDA]; transcription [goid 6350] [evidence IEA]; development [goid 7275] [evidence IEA]; regulation of transcription, DNA-dependent [goid 6355] [evidence IEA]; positive regulation of transcription [goid 45941] [evidence IDA]; tra…	protein binding [goid 5515] [evidence IPI]; transcription regulator activity [goid 30528] [evidence IEA]; metal ion binding [goid 46872] [evidence IEA]; zinc ion binding [goid 8270] [evidence IEA]; DNA binding [goid 3677] [evidence IEA]; protein binding [goid 5515] [evidence IPI]; transcription regulator activity [goid 30528] [evidence IEA]; metal ion binding [goid 46872] [evidence IEA]; zinc ion…
1230086	0.205427	2.9147	0.00921269	0.698197	-2.51431	NA	Solh
3830482	0.360162	2.92454	0.00901842	0.698197	-2.49781	381085	BC045600	17	17qA3.3	Mus musculus TBC1 domain family, member 22B (Tbc1d22b), mRNA.
4260296	-0.203829	-2.91514	0.00920395	0.698197	-2.51357	22592	Ercc5	1	1qC1.1	Mus musculus excision repair cross-complementing rodent repair deficiency, complementation group 5 (Ercc5), mRNA.	nucleus [goid 5634] [evidence IEA]; nucleus [goid 5634] [evidence IEA]	response to UV [goid 9411] [evidence IMP]; determination of adult life span [goid 8340] [evidence IMP]; nucleotide-excision repair [goid 6289] [evidence IEA]; DNA repair [goid 6281] [evidence IMP]; response to DNA damage stimulus [goid 6974] [evidence IEA]; response to UV [goid 9411] [evidence IMP]; determination of adult life span [goid 8340] [evidence IMP]; nucleotide-excision repair [goid 6289…	nuclease activity [goid 4518] [evidence IEA]; single-stranded DNA binding [goid 3697] [evidence IEA]; hydrolase activity [goid 16787] [evidence IEA]; DNA binding [goid 3677] [evidence IEA]; endonuclease activity [goid 4519] [evidence IEA]; nuclease activity [goid 4518] [evidence IEA]; single-stranded DNA binding [goid 3697] [evidence IEA]; hydrolase activity [goid 16787] [evidence IEA]; DNA bindi…
4920647	-0.287566	-2.9204	0.00909969	0.698197	-2.50475	NA	2810474O19Rik
5080292	0.26799	2.91585	0.00918977	0.698197	-2.51238	16011	Igfbp5	1	1qC3	Mus musculus insulin-like growth factor binding protein 5 (Igfbp5), mRNA.	extracellular region [goid 5576] [evidence IEA]; insulin-like growth factor binding protein complex [goid 16942] [evidence IC ]	regulation of cell growth [goid 1558] [evidence IEA]	growth factor binding [goid 19838] [evidence IEA]; insulin-like growth factor binding [goid 5520] [evidence IPI]
5290189	0.215017	2.92015	0.00910474	0.698197	-2.50518	13424	Dnchc1	12	12qF1	Mus musculus dynein cytoplasmic 1 heavy chain 1 (Dync1h1), mRNA.	cytoplasmic dynein complex [goid 5868] [evidence IEA]; microtubule [goid 5874] [evidence IEA]; dynein complex [goid 30286] [evidence IEA]	microtubule-based movement [goid 7018] [evidence IEA]	protein binding [goid 5515] [evidence IPI]; motor activity [goid 3774] [evidence IEA]; ATP binding [goid 5524] [evidence IEA]; nucleoside-triphosphatase activity [goid 17111] [evidence IEA]; microtubule motor activity [goid 3777] [evidence IEA]; ATPase activity [goid 16887] [evidence IEA]
5860377	-0.229386	-2.91743	0.00915843	0.698197	-2.50973	NA	Usp15
620041	-0.276603	-2.92164	0.00907523	0.698197	-2.50267	12807	Hps3	3	3qA2	Mus musculus Hermansky-Pudlak syndrome 3 homolog (human) (Hps3), mRNA.	cytoplasm [goid 5737] [evidence IDA]; cytoplasm [goid 5737] [evidence IDA]	organelle organization and biogenesis [goid 6996] [evidence IMP]; organelle organization and biogenesis [goid 6996] [evidence IMP]
1190491	0.21408	2.90218	0.0094658	0.704962	-2.53528	55979	Agpat1	17	17qB1	Mus musculus 1-acylglycerol-3-phosphate O-acyltransferase 1 (lysophosphatidic acid acyltransferase, alpha) (Agpat1), mRNA.	membrane [goid 16020] [evidence IEA]	metabolism [goid 8152] [evidence IEA]; phospholipid biosynthesis [goid 8654] [evidence IEA]	acyltransferase activity [goid 8415] [evidence IEA]; transferase activity [goid 16740] [evidence IEA]; 1-acylglycerol-3-phosphate O-acyltransferase activity [goid 3841] [evidence IEA]
2070519	0.274567	2.89811	0.00954962	0.704962	-2.54211	NA	Nnmt
2940661	-0.217918	-2.90656	0.00937655	0.704962	-2.52795	NA	Whrn
3610039	0.228976	2.90075	0.00949529	0.704962	-2.53769	NA	Pcsk1n
4230086	0.221098	2.90376	0.00943363	0.704962	-2.53265	NA	Slc39a13
4640717	-0.244872	-2.89847	0.00954222	0.704962	-2.54151	NA	1110001A05Rik
620543	-0.245597	-2.90304	0.00944821	0.704962	-2.53384	NA	C630011I23
7320136	-0.231973	-2.89755	0.00956115	0.704962	-2.54304	NA	Glg1
7650209	0.237246	2.89931	0.00952475	0.704962	-2.54009	70247	Psmd1	1	1qC5	Mus musculus proteasome (prosome, macropain) 26S subunit, non-ATPase, 1 (Psmd1), mRNA.	cytosol [goid 5829] [evidence IEA]; protein complex [goid 43234] [evidence IEA]		binding [goid 5488] [evidence IEA]
5720301	0.244396	2.89536	0.0096065	0.705286	-2.5467	NA	Baiap1
6620747	0.204119	2.89456	0.00962316	0.705286	-2.54804	NA	Bcl9
5260025	0.210215	2.89	0.00971841	0.71014	-2.55567	56839	Lgi1	19	19qC3	Mus musculus leucine-rich repeat LGI family, member 1 (Lgi1), mRNA.			transferase activity [goid 16740] [evidence IEA]; transferase activity [goid 16740] [evidence IEA]
1410575	0.20917	2.87166	0.0101113	0.710464	-2.58633	NA	D130017N08Rik
2030138	0.204478	2.8738	0.0100647	0.710464	-2.58276	NA	D130003E24Rik
2260551	0.209151	2.88568	0.00980958	0.710464	-2.56289	12827	Col4a2	8	8qA1.1	Mus musculus procollagen, type IV, alpha 2 (Col4a2), mRNA.	collagen type IV [goid 5587] [evidence IDA]; extracellular matrix (sensu Metazoa) [goid 5578] [evidence IEA]; basement membrane [goid 5604] [evidence IDA]; collagen [goid 5581] [evidence IEA]; cytoplasm [goid 5737] [evidence IEA]	cell adhesion [goid 7155] [evidence IEA]; phosphate transport [goid 6817] [evidence IEA]	extracellular matrix structural constituent [goid 5201] [evidence IEA]; extracellular matrix structural constituent conferring tensile strength [goid 30020] [evidence IEA]; structural molecule activity [goid 5198] [evidence IEA]
290070	-0.273244	-2.87999	0.00993111	0.710464	-2.57242	17463	Psmd7	8	8qD3	Mus musculus proteasome (prosome, macropain) 26S subunit, non-ATPase, 7 (Psmd7), mRNA.	protein complex [goid 43234] [evidence IEA]; cytosol [goid 5829] [evidence IEA]; protein complex [goid 43234] [evidence IEA]; cytosol [goid 5829] [evidence IEA]
380563	-0.227231	-2.88692	0.00978352	0.710464	-2.56083	NA	LOC381510
